# Supplementary material
Source: Research Square preprint supplement (doi:10.21203/rs.3.rs-9255883/v1)
Supplement: Supplementary file 2 [file 61a723d310836479bf8646c8.docx]

**sTable 1. Volume changes in diffuse neurofibromas after selumetinib treatment**

| Group | No. | Children/Adults | Location of diffuse neurofibroma | Last MRI before selumetinib | | MRI studies during selumetinib (mL) | | | | |
| --- | --- | --- | --- | --- | --- | --- | --- | --- | --- | --- |
| Time from the baseline (months) | Pre-treatment  (mL) | Cycle 0 | Cycle 6 | Cycle 12 | Cycle 18 | Cycle 26 |
| PR | S10 | Children | Right shoulder | 25 | 22682.78 | 28642.61 | 25656.76 | 20022.35 | 20725.39 | 21452.69 |
| S20 | Adult | Left flank | 23 | 2740.769 | 22116.61 | 16768.05 | 14134.13 | 14058.55 | 15138.49 |
| S36 | Adult | Left neck | 3 | 47398.39 | 47726.19 | 38924.27 | 34784.72 | 33227.55 | 40454.77 |
| S45 | Adult | Left periorbital | 7 | 7899.103 | 10442.67 | 7874.604 | 8230.136 | 8104.397 | 8738.69 |
| S81 | Children | Left leg | 43 | 1100.577 | 2669.699 | 1189.254 | 1473.17 | 2018.077 | 1229.337 |
| S88 | Children | Right elbow | 23 | 3164.982 | 9592.083 | 7570.438 | 5569.313 | 4919.644 | 4885.276 |
| SD | S13 | Children | Scalp | 119 | 15896.41 | 107219.8 | 94500.14 | 101096.7 | 96721.65 | 96777.35 |
| S17 | Adult | Scalp | 25 | 19328.07 | 21379.12 | 17157.72 | 17727.29 | 18783.87 | 20792.67 |
| S41 | Adult | Rt shoulder | 39 | 81374.57 | 100661.3 | 96016.31 | 96803.05 | 102469.3 | 91886.8 |
| S48 | Adult | Left periorbital | 101 | 5992.253 | 7788.42 | 7717.609 | 8359.274 | 8203.828 | 7869.721 |
| S50 | Children | Right face | 7 | 177727.8 | 193308.8 | 170841.1 | 174391.4 | 152887.5 | 158919.4 |
| S51 | Children | Left ankle | 29 | 82182.18 | 140777.5 | 127415.9 | 117014.1 | 98804.98 | 131924.8 |
| S56 | Children | Left hip | 22 | 63798.25 | 89411.05 | 85030.11 | 88656.89 | 91537.71 | 83917.68 |
| S65 | Adult | Left wrist | 5 | 45605.42 | 55469.79 | 63731.13 | 64058.97 | 48408.28 | 51641.9 |
| S90 | Children | Scalp | 7 | 69053.53 | 71363.26 | 82635.66 | 73457.28 | 78470.35 | 73697.99 |
| PD | S09 | Children | Left thigh | 19 | 19621.26 | 46116.45 | 38627.67 | 73244.1 | 66622.48 | 60192.59 |
| S19 | Adult | Left back | 9 | 8003.623 | 15061.35 | 18783.3 | 16729.33 | 18181.39 | 22702.92 |
| S33 | Adult | Scalp | 26 | 28003.24 | 31138 | 33661.05 | 35055.99 | 47912.85 | 40271.28 |
| S34 | Adult | Scalp | 13 | 10564.78 | 11016.39 | 15915.92 | 16040.05 | 13586.07 | 22582.39 |
| S42 | Adult | Right face | 6 | 19672.04 | 20109.13 | 26428.15 | 28493.15 | 25320.82 | 25802.94 |
| S44 | Children | Right thigh | 12 | 130309.7 | 132497.5 | 192826.4 | 180601.7 | 218730.4 | 284992.4 |
| S58 | Children | Right knee | 34 | 20277.64 | 53171.27 | 56457.9 | 63381.22 | 68794.67 | 85175.43 |
| S67 | Children | Right arm | 35 | 1236.986 | 2409.038 | 1743.926 | 4903.009 | 1934.707 | 4227.812 |
| S75 | Children | Left hip | 25 | 16112.54 | 28538.62 | 28841.73 | 50060.52 | 43494.43 | 52181.73 |
| S78 | Children | Neck | 14 | 56934.18 | 55725.12 | 51145.25 | 60951.01 | 71700.17 | 87920.94 |

PR, partial response; SD, stable disease; PD, progressive disease

**sTable 2. Changes in pain score**

| **No.** | **Children/Adult** | **Location of diffuse neurofibroma** | **MRI studies during selumetinib (mL)** | | | | |
| --- | --- | --- | --- | --- | --- | --- | --- |
| **Cycle 0** | **Cycle 6** | **Cycle 12** | **Cycle 18** | **Cycle 26** |
| **S88** | Children | Right elbow | 2 | 2 | 2 | 2 | 2 |
| **S65** | Adult | Left wrist | 11 | 6 | 1 | 5 | Not applicable |

**sTable 3. Changes in optic pathway glioma after selumetinib treatment**

| **Group** | | **Complete response** | **Stable disease** | |
| --- | --- | --- | --- | --- |
| Subject Number | | S11 | S28 | S35 |
| Children/Adult | | Children | Children | Adult |
| Laterality | | Left | Right | Right |
| location | | Nerve | Nerve | Nerve |
| **Baseline** | Largest (mm) | 17.89 | 34.32 | 20.78 |
| Perpendicular (mm) | 3.82 | 4.89 | 3.67 |
| Tumor size (mm²) | 68.3398 | 167.8248 | 76.2626 |
| **1 year of selumetinib** | Largest (mm) | 13 | 33.31 | 22.72 |
| Perpendicular (mm) | 3.36 | 4.91 | 3.23 |
| Tumor size (mm²) | 43.68 | 163.5521 | 73.3856 |
| **2 years of selumetinib** | Largest (mm) | 0 | 35.67 | 22.97 |
| Perpendicular (mm) | 0 | 4.61 | 3.55 |
| Tumor size (mm²) | 0 | 164.4387 | 81.5435 |

CR, complete response; SD, stable disease

**sFigure 1. Changes in the overall quality-of-life scores in (A) children (n=14) and (B) their parents or guardians (n=14) and adult patients (n=14).** Each graph presents the means (circles) and the standard error of means at each evaluation point. A lower score indicates improvement. Red box: worsened score at cycle 26; Gray box: unchanged score at cycle 26; Blue box: improved score at cycle 26.
