# Supplementary material
Source: Research Square preprint supplement (doi:10.21203/rs.3.rs-9255883/v1)
Supplement: Supplementary file 3 [file 8b34edc1970d828eb67ed4c8.docx]

**Statistical Analysis Plan (SAP)**

**Protocol for: Kim H, Yoon HM, Kim EK, et al. Safety and efficacy of selumetinib in pediatric and adult patients with neurofibromatosis type 1 and plexiform neurofibroma**

Version: June 20, 2020


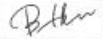


Beom Hee Lee, MD, PhD December 19, 2025

# Statistical analyses

## **Description of analysis sets**

### Safety analysis set

 Safety will be assessed in all patients who received at least one dose of study drugs.

### Efficacy analysis set

Efficacy will be assessed in all patients who received at least one dose of study drugs.

## **Sample size estimate**

The estimated sample size is 90. In the stratum 1 of SPRINT study (17), the incidence of decreased left ventricular ejection fraction with CTCAE grade ≥3 was 4.2% (1 out of 24). If this was the real-world incidence of this adverse event, then a sample of 90 patients would provide a 97.9% probability of observing at least one event (i.e. with n=90 and 3.8 events observed, the estimated incidence is 3.8/90=4.2% and the exact 95% CI for this would be 1.11% to 10.68% by “Clopper-Pearson CIs”).

25 mg per square meter of AZD6244 (Selumetinib; AstraZeneca, Cambridge, England) with a median 30 cycles (28-day cycle) resulted in tumor volume decreases from baseline of ≥20% in 71% pediatric patients (17). Based on adult studies using flat dosing, Asian ethnic group is suggested to have higher exposure of selumetinib than non-Asian group. However, only one study was reported about pharmacokinetics of selumetinib in Asian healthy adult subjects. In this study, dose-normalized AUC and Cmax were 35% and 39% (95% of confidence interval) higher in the pooled Asian group, respectively, compared with those in Western subjects.

Therefore, in the initial stage, a total of 10 evaluable pediatric (group 1) and 10 adult Korean patients (group 2) are to be entered. The 10 pediatric patients will be treated with a reduced dosage of 20 mg/m2/dose q 12 hrs and the 10 adult patients with 50 mg/dose q 12 hrs. If there is no serious adverse reaction in 6 out of 10 patients for the first six cycles, another 20 pediatric patients (age 3 - 18 yr, group 1) will be treated with 20 mg/m2/dose q 12 hrs, and another 30 pediatric patients (age 3 -18 yr, group 3) and 20 adult patients (age >18 years, group 4) will be treated with 25 mg/m2/dose q 12 hrs. If we see a serious adverse reaction in 4 out of 10 patients in group 3 and 4, the dose will be reduced from 25 to 20 mg/m2/dose q 12 hrs in group 3 and 4.

More recently, AstraZeneca has conducted a population pharmacokinetic analysis, which indicated that race has minor impact on selumetinib Clearance. This analysis shows that the clinical impact for a typical Asian individual (29-years-old, Body surface area (BSA) of 1.8 m2) as well as for 10 years old with BSA of 1m2 was less than 20% for clearance. More than the race or ethnicity, BSA was highly correlated and had significant impact on selumetinib exposure. BSA changes might have more than 20% impact on exposure, suggesting BSA based dosing might be appropriate across age range. Therefore, another 20 adult patients (group 4) will be treated with 25 mg/m2/dose q 12 hrs. If we see a serious adverse reaction in 4 out of 10 patients in group 4 the dose will be reduced from 25 to 20 mg/m2/dose q 12 hrs in group 4

## **Outcome measures and methods of statistical analysis**

### Safety analysis

- CTCAE term (AE description) and grade: The descriptions and grading scales found in the NCI Common Terminology Criteria for Adverse Events (CTCAE) version 5.0 will be utilized for AE reporting. All appropriate treatment areas should have access to a copy of the CTCAE version 4.0. A copy of the CTCAE version 5.0 can be downloaded from the CTEP web site. http://ctep.cancer.gov/protocolDevelopment/electronic_applications/ctc.htm.
- PK parameters (CL/F and V/F) and exposure parameters (Cmax and AUC) will be described. The correlation with any adverse events and PK parameters will be assessed.

### Efficacy analysis

- PN volume will be measured by 3D MRI volumetric analysis. The range and mean value of decreased volume with standard deviation will be presented in group 1, 2 and 3. Objective response rate (defined as PN decrease ≥20% compared to baseline) will be presented in group 1, 2 and 3 as the number of patients with response over the total number of patients in each group.
- For resting state fMRI will be done. Functional connectivity (FC) changes from baseline will be measured. The correlation coefficients will be calculated between the selected regions which indicate the strength of FC among the two regions, producing a matrix for each subject. The regions associated with visuospatial network and default mode network will be selected.
- Neuropsychiatric test: Korean Wechsler Preschool and Primary Scale of Intelligence (K-WPPSI) will be done for patients < age 6 years, Korean Wechsler intelligence scale for children-fourth edition (K-WISC-IV) will be done for patients with age 6-15 years and Korean Wechsler adult intelligence scale-fourth edition (K-WAIS-IV) will be done for patients ≥ age 16 years. Verbal comprehension index (VCI), perceptual reasoning index (PCI), working memory index (WMI), processing speed index (PSI) an full scale IQ (FSIQ) will be measured. Advanced test of attention (ATA) will be done for patients with age 5-18 years. Seoul Computerized Neurocognitive Function Test (SCNT) will be done for patients’ ≥ age 19 years. The changes of score in each item will be summarized from baseline across the study period.
- Quality of Life and pain will be assessed with patient-reported outcomes (PROs). Changes in each subscale of PROs after treatment will be assessed. PedsQL 4.0 Generic Core Scales are multidimensional child self-report and parent proxy-report scales to assess health-related quality of life (QOL) in children, adolescents, and young adults aged 2 – 25 years. INF1-QOL for patients >18 years old. Korean Neuropathic Pain Questionnaire (KNPQ) for adults >18 years of age and Numeric Pain Rating Scale (NPS)/Wong-Baker Faces Pain Rating Scale (WBS) for patients with 18 years of age will used for pain assessment.
- Kinome analysis and gene expression profiles will be compared before treatment and after treatment and compared between patients with good response (over 20% volume decrease of PN) and patients with poor response (less than 20% volume decrease of PN).
- The types of mutations and their locations along the functional domain of the *NF1* gene will be analysed with the response (good or poor) of PN in the patients (chi-square test).
- The percent of patients in whom the surgical excision was done after the administration of selumetinib will be calculated as the number of patients who received the surgical resection/total number of patients (%).
- With information obtained from patient diaries, adherence will be calculated as follows: [(scheduled doses – missed doses) / scheduled doses X 100. For pill counts, the number of pills returned to clinic will be subtracted from the number of pills dispensed at the previous visit. That number will be divided by the number of pills the patient should have taken according to their prescribed dosing schedule, and then multiplied by 100 to obtain the adherence percentage.
