# Supplementary material
Source: Research Square preprint supplement (doi:10.21203/rs.3.rs-9255883/v1)
Supplement: Supplementary file 4 [file 9196010d62aef5b680665af8.docx]

**Protocol for: Kim H, Yoon HM, Kim EK, et al. Safety and efficacy of selumetinib in pediatric and adult patients with neurofibromatosis type 1 and plexiform neurofibroma**

Study Funding:This research was supported in part by an externally sponsored research program (ESR-17-12847) from AstraZeneca, in collaboration with Merck Sharp & Dohme LLC, a subsidiary of Merck & Co., Inc. (Rahway, NJ, USA); the Korea Health Technology R&D Project through the Korea Health Industry Development Institute (KHIDI), funded by the Ministry of Health & Welfare, Republic of Korea (grant number: HR21C0198); the National Research Foundation of Korea (NRF) grant funded by the Korean government (MSIT) (No. 2022R1A2C2091689); and the Asan Institute for Life Sciences, Seoul, Republic of Korea (2024IF0023, 2024IP0076).

Principal Investigator/Study Chair: Beom Hee Lee

Version 1.2: 18 June 2018

INVESTIGATOR AGREEMENT

[Protocol Number] **Safety and efficacy of selumetinib in pediatric and adult patients with neurofibromatosis type 1 and plexiform neurofibroma**

By signing, the Investigator agrees to have read the foregoing protocol and agrees to conduct the study as described herein.

The Investigator agrees to keep all study documents stored appropriately to ensure their confidentiality. The Investigator should not disclose study information to others without authorization, except to the extent necessary to conduct the study.

_______Beom Hee Lee MD, PhD______________________________

Investigator Name (Print)


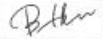


______________________________________ ____December 19, 2025_________

Investigator Signature Date

Table of Content

| Original protocol | Page 3 |
| --- | --- |
| Summary of changes to the protocol | Page 84 |

**<Original Protocol>**

|  | Drug Substance | Selumetinib (AZD6244; ARRY-142886) |
| --- | --- | --- |
|  | Study Number | ESR-17-12847 |
|  | Company Reference | ESR-17-12847 |
|  | Version | 1.2 |
|  | Date | 18 JUN 2018 |
|  |  |  |
|  | | |
| Safety and efficacy of Selumetinib in Korean patients with neurofibromatosis type 1 and plexiform neurofibromas | | |
|  | | |
| title page | | |
|  | | |
| This submission /document contains trade secrets and confidential commercial information, disclosure of which is prohibited without providing advance notice to AstraZeneca and opportunity to object. | | |
|  | | |

PROTOCOL SYNOPSIS

| Safety and efficacy of Selumetinib in Korean patients with neurofibromatosis type 1 and plexiform neurofibromas |
| --- |

**Principal Investigator**

Beom Hee Lee, M.D., Ph.D.

Fax: 82-2-3010-4702

Phone: 82-2-3010-5950

Address: Medical Genetics Center, Asan Medical Center

Olympic-ro 43-gil-88, Songpa-gu, Seoul, Korea 05505

Study site(s) and number of subjects planned

1 site (Medical Genetics Center, Asan Medical Center, Seoul, Korea)

30 subjects

| Study period |  | Phase of development |
| --- | --- | --- |
| Estimated date of first subject enrolled | 1Q 2019 |  |
| Estimated date of last subject completed | 1Q 2022 |  |

Study design

This is a phase II trial of selumetinib administered orally BID (approximately every 12 hours) on a continuous dosing schedule for Korean patients with NF1 and inoperable PN.

The dose administered will be the maximum tolerated dose (20-25 mg/m2/dose q 12 hrs for patients with age ≥ 3 years and ≤18 years and 50 mg/dose q 12 hrs for patients with age > 18 years). The total duration of treatment will be 2 years of 26 cycles. A cycle of therapy is considered to be 28 days with no rest periods in between cycles.

Objectives

| **Primary Objective:** | **Outcome Measure:** |
| --- | --- |
| *To evaluate the safety of selumetinib in Korean patients with NF1 and PN and pharmacokinetic analysis* | Safety analysis  - All AEs, including clinically significant abnormal findings on laboratory evaluations, regardless of severity, will be followed until satisfactory resolution. Adverse events will be identified and graded using the NCI Common Toxicity Criteria version 4 (CTCAE-4), and it will be determined if the adverse event is related to the medical treatment (attribution).   - History, physical exam, vital signs: q 2wks (baseline ~ cycle 3), and then after q 1 cycle - CBC with differential counts, chemistry, phosphorus, electrolytes, magnesium, CPK, urinalysis with micro: every other week (baseline ~ cycle 3), and then after q 3 cycles - EKG and echocardiography: prior to cycle 1, 4, 7, and then after every 6 cycles (13, 19 etc.) - Ophthalmology exam – A complete ophthalmology evaluation at baseline and then after every 6 cycles (13, 29 etc.)   - Plasma samples for the evaluation of selumetinib pharmacokinetics will be obtained prior to and after the first dose of selumetinib, and at steady state during the first treatment cycle. |

| **Secondary Objective:** | **Outcome Measure:** |
| --- | --- |
| *To determine the effect of selumetinib on the volume reduction of PN using MRI analysis. (The decrease in volume (≥20%) of target PN)* | Objective response rate (defined as PN decrease ≥20% compared to baseline) using read 3D MRI volumetric analysis |
| *To assess quality of life and pain in patients with NF1 and PN after administration of selumetinib* | A validated disease-specific questionnaire to measure QOL and pain in patients with NF1 will be used [references, (1, 2) ]. |
| *To measure changes in Kinome activity by Kinase array (from baseline to 1 and 2 yrs)* | Measurement of human phosphor-kinase array in the peripheral blood mononuclear cells (PBMC) from baseline, cycle 7, 13 and 26 |
| *To measure changes of transcriptome profiles by gene expression array (from baseline to 1 and 2 yrs)* | Measurement of human transcriptome profiles in the PBMC from baseline, cycle 7, 13 and 26 |
| *To measure changes in neurofunctional images (from baseline to 1 and 2 yrs)* | Functional Brain MRI: prior to cycle 1, and then after every 12 cycles (13 and 26) |
| *To measure changes in neuropsychiatric function (from baseline to 1 and 2 yrs)* | Neuropsychiatric test: prior to cycle 1, and then after every 12 cycles (13 and 26) |
| *To describe the correlation of clinical response to selumetinib with germline NF1 genotype* | Genotype and phenotype correlation between NF1 mutation and response rate of PN reduction by selumetinib. |

Target subject population

*Patients with neurofibromatosis type I, in whom genetic study was performed for the germline NF1 mutations, and inoperable measurable plexiform neurofibromas that have the potential to cause significant morbidity. Patients must have at least one measurable PN, defined as a lesion of at least 3 cm measured in one dimension.*

Duration of treatment

The total duration of treatment will be 2 years of 26 cycles. A cycle of therapy is considered to be 28 days with no rest periods in between cycles. If a patient is deriving clinical benefit at 2 years, the duration of treatment will be extended and the number of patients will also be increased.

Investigational product, dosage and mode of administration

| Investigational product | Dosage form and strength | Manufacturer |
| --- | --- | --- |
| Selumetinib® (AZD6244; ARRY-142886) | - Patients with age ≥ 3 years and ≤18 years: 20-25 mg/m2/dose q 12 hrs - Patients with age > 18 years: 50 mg/dose q 12 hrs - 28 days /cycle x 26 cycles (2 years) | AstraZeneca |

Selumetinib will be administered orally BID (approximately every 12 hours) on a continuous dosing schedule.

Statistical methods

- PN volume will be measured by 3D MRI volumetric analysis, the rate of response with a 95% confidence interval and Wilcoxon rank test will be applied to determine the statistical significance.
- Quality of Life and Pain will be assessed with patient-reported outcomes (PROs). Changes in each subscale of PROs after treatment will be assessed.
- Kinome analysis and gene expression profiles will be compared before treatment and after treatment and compared between patients with good response (over 20% volume decrease of PN) and patients with poor response (less than 20% volume decrease of PN).
- The types of mutations and their locations along the functional domain of the *NF1* gene will be analysed with the response (good or poor) of PN in the patients (chi-square test).

| TABLE OF CONTENTS | Page |
| --- | --- |

title page 3

PROTOCOL SYNOPSIS 4

TABLE OF CONTENTS 9

1. introduction 14

1.1 Background and rationale for conducting this study 14

1.2 Rationale for study design, doses and control groups 15

1.3 Benefit/risk and ethical assessment 16

1.4 Study Design 17

2. Study objectives 19

2.1 Primary objective 19

2.2 Secondary objectives 20

3. SUBJECT SELECTION, enrolment, randomisation, restrictions, discontinuation and WITHDRAWAL 20

3.1 Inclusion criteria 20

3.2 Exclusion criteria 21

3.3 Subject enrolment and randomization 23

3.4 Procedures for handling incorrectly enrolled subjects 24

3.5 Methods for assigning treatment groups 24

3.6 Discontinuation of investigational product 24

3.6.1 Procedures for discontinuation of a subject from investigational product 25

3.7 Criteria for withdrawal 25

3.7.1 Screen failures 25

3.7.2 Withdrawal of the informed consent 25

3.8 Discontinuation of the study 26

4. Study plan and timing of procedures 27

4.1 Enrolment/screening period 29

4.2 Treatment period 30

4.3 Follow-up period 30

5. study assessments 31

5.1 Efficacy assessments 32

5.1.1 Volumetric whole body MRI: 32

5.1.2 Functional Brain MR and Neuropsychiatric test: 32

5.1.3 Quality of life and Pain assessment: 32

5.1.4 Kinome activity: 32

5.1.5 Gene expression array: 32

5.1.6 Genotype and phenotype correlation: 32

5.2 Safety assessments 33

5.2.1 Laboratory safety assessments 33

5.2.2 Physical examination 34

5.2.2.1 12-lead EKG and echocardiography 34

5.2.3 Opthalmological evaluation 35

5.2.4 Bone growth assessment 35

5.3 Other assessments 35

5.3.1 Patient reported outcomes 35

5.3.1.1 General Health-Related Quality of Life 35

5.4 Pharmacokinetics 36

5.4.1 Collection of samples 36

5.4.2 Determination of drug concentration 36

5.4.3 Storage and destruction of pharmacokinetic samples 37

5.4.4 Storage, re-use and destruction of pharmacodynamic samples 37

5.5 Pharmacogenetics 37

5.6 Biomarker analysis 37

5.6.1 Storage, re-use and destruction of biological samples 37

5.6.2 Withdrawal of Informed Consent for donated biological samples 37

6. safety reporting and medical management 38

6.1 Definition of adverse events 38

6.2 Definitions of serious adverse event 39

6.3 Recording of adverse events 39

6.3.1 Time period for collection of adverse events 39

6.3.2 Follow-up of unresolved adverse events 39

6.3.3 Variables 39

6.3.4 Causality collection 41

6.3.5 Adverse events based on signs and symptoms 41

6.3.6 Adverse events based on examinations and tests 41

6.3.7 Hy’s Law 42

6.3.8 Disease progression 42

6.4 Reporting of serious adverse events to the IRB and/or the Regulatory Authority 42

6.5 Reporting of serious adverse events to Company 43

6.6 Overdose 43

6.7 Pregnancy 43

6.7.1 Maternal exposure 44

6.7.2 Paternal exposure 44

6.8 Management of IP related toxicities <<Dose Reductions>> 45

7. investigational product and other Treatments 56

7.1 Identity of investigational product(s) 56

7.2 Dose and treatment regimens 56

7.3 Labelling 57

7.4 Storage 58

7.5 Compliance 58

7.6 Accountability 59

7.7 Concomitant and other treatments 59

7.7.1 Other concomitant treatment 60

8. statistical analyses 60

8.1 Description of analysis sets 60

8.1.1 Safety analysis set 60

8.1.2 Efficacy analysis set 60

8.2 Sample size estimate 60

8.3 Definitions of analysis sets, outcome measures and methods of statistical analysis 61

8.3.1 Safety analysis 61

8.3.2 Efficacy analysis 61

9. Study and data MANAGEMENT 63

9.1 Training of study site personnel 63

9.2 Monitoring of the study 63

9.2.1 Source data 63

9.2.2 Research Agreement(s) 64

9.2.3 Archiving of study documents 64

9.3 Study timetable and end of study 64

9.4 Data management 64

10. Ethical and regulatory requirements 65

10.1 Ethical conduct of the study 65

10.2 Subject data protection 65

10.3 Ethics and regulatory review 65

10.4 Informed consent 66

10.5 Changes to the protocol and informed consent form 66

10.6 Audits and inspections 67

11. LIST OF References 67

LIST OF TABLES

Table 1 Study Plan detailing the procedures 26

Table 2Laboratory Safety Variables 32

Table 3 Inhibitors of CYP1A2, CYP2C19 or CYP3A4 81

Table 4 Inducers of CYP1A2, CYP2C19 or CYP3A4 81

LIST OF FIGURES

Figure 1. Study flow chart 16

LIST OF APPENDICES

Appendix A. Pharmacokinetic Worksheet 68

Appendix B. Whole body MR volumetry protocol 69

Appendix C. Peripheral Blood Mononuclear Cell Samples (PBMCs) and Plasma 72

Appendix D. Performance Status Scales/Scores 73

Appendix E. Actions Required in Cases of Increases in Liver Biochemistry and Evaluation of Hy’s Law 74

Appendix F. Further Guidance on the Definition of a Serious Adverse Event (SAE)….………...…………………………………...….…..……….......79

Appendix G. Inhibitors and Inducers of CYP1A2, CYP2C19 OR CYP3A4…………………………………………………….……………81

List of abbreviations and definition of terms

The following abbreviations and special terms are used in this study Clinical Study Protocol.

| Abbreviation or special term | Explanation |
| --- | --- |
| AE | Adverse event |
| CRF | Case Report Form (electronic/paper) |
| CSR | Clinical Study Report |
| CTCAE | Common Terminology Criteria for Adverse Event |
| DAE | Discontinuation of Investigational Product due to Adverse Event |
| DNA | Deoxyribonucleic acid |
| EC | Ethics Committee, synonymous to Institutional Review Board (IRB) and Independent Ethics Committee (IEC) |
| GCP | Good Clinical Practice |
| ICH | International Conference on Harmonisation |
| International Co‑ordinating investigator | If a study is conducted in several countries the International Co-ordinating Investigator is the Investigator co-ordinating the investigators and/or activities internationally. |
| IP | Investigational Product |
| KNPQ | Korean Neuropathic Pain Questionnaire |
| LC-MS | Liquid chromatography-mass spectrometer |
| LSLV | Last Subject Last Visit |
| MGAMC | Medical Genetics Center, Asan Medical Center, Seoul, Korea |
| NF1 | Neurofibromatosis type 1 |
| NPRS | Numeric Pain Rating Scale |
| OAE | Other Significant Adverse Event |
| PBMC | Peripheral blood mononuclear cell |
| PI | Principal Investigator |
| PN | plexiform neurofibromas |
| QOL | Quality of Life |
| RA | Research Agreement |
| SAE | Serious adverse event |
| WBDC | Web Based Data Capture |
| WBS | Wong-Baker FACES Pain Rating Scale |

# introduction

## Background and rationale for conducting this study

Neurofibromatosis type 1 (NF1) is one of the most common genetic diseases. NF1 is inherited in an autosomal dominant trait affecting 1:3,000 people worldwide (3). NF1 is characterized by multiple cutaneous café-au-lait spots and cutaneous neurofibromas. In addition, variable degree of neurological, skeletal, and neoplastic manifestations may affect patients. The patients with NF1 have a risk for developing tumors of the central and peripheral nervous system including plexiform neurofibromas (PN) (27%), optic gliomas (15-20%), pheochromocytomas (1%), and malignant peripheral nerve sheath tumors (5%) (4, 5). PN is one of the most devastating complications of NF1. As benign nerve sheath tumors, PNs grow along the length of nerves and involve multiple branches of a nerve. Many PNs are thought to be congenital, but may not be diagnosed until later in life with consistent growth. PNs may cause significant morbidity by compression of vital structures of a body, pain, and disfigurement. More importantly, it confers risk for malignant transformation. Currently, surgery has been suggested as the only standard treatment of PN. However, up to 44% of tumors progress after the first surgery, especially in patients younger than ten years of age with head and neck tumors that could not be completely resected (6, 7).

Most individuals with NF1 have normal intelligence. However, learning deficit or behavioral problems are noted in 50%-80% (8). Learning and behavioral problems may persist into adulthood (9). Deficits in attention are also seen in patients with NF1 (8).

NF1 is caused by the germline loss-of-function of the NF1 gene at 17q11.2. NF1 encodes a tumor suppressor, neurofibromin, regulating RAS activity by hydrolysis of RAS-GTP to RAS-GDP (10). Histologically, PNs are composed of neoplastic Schwann cells accompanied by a varying number of cellular and non-cellular components including fibroblasts, perineural cells, and mast cells. The loss-of-heterozygosity for NF1 is associated with development of PN in neoplastic Schwann cells (7, 11). Therefore, loss of neurofibromin is associated with elevated levels of activated RAS. Activated RAS results in the increased activity of RAF and MAPK, which is an important signalling pathway for the increased cell growth, proliferation and differentiation.

Previously, several clinical trials with targeted agents have been conducted with variable results (12) including tipifarnib (13), pirfenidone (14), sirolimus (14), pegylated interferon alfa-2b (15), and imatinib (16). Among these trials, at least 20% decrease of tumor volume from baseline were identified in only 4 of 83 patients (5%) in the pegylated interferon alfa-2b trial (15) and in only 5 of 36 patients (14%) in the imatinib trial (16).

Recently, AZD6244 (Selumetinib; AstraZeneca, Cambridge, England) has shown to decrease the size of PN without serious adverse reaction in pediatric patients (17). In this Phase II study, treatment with selumetinib (25 mg per square meter with a median 30 cycles (28-day cycle) resulted in tumor volume decreases from baseline of ≥20% in 71% pediatric patients without any disease progression. and decreases from baseline in neurofibroma volume in 12 of 18 mice (67%). Disease progression (tumor volume increase from baseline of ≥20%) has not been observed to date. However, despite the promising result of selumetinib on decreasing the PN size, individual differences (16% – 44% reduction of tumor volume from the baseline) were noted among patients regarding the response to selumetinib. In addition, Asian ethnic group is suggested to have higher exposure of selumetinib than non-Asian group. However, only one study was reported about pharmacokinetics of selumetinib in Asian healthy adult subjects (18). In this study, dose-normalized AUC and Cmax were 35% and 39% (95%) higher in the pooled Asian group, respectively, compared with those in Western subjects. Therefore, a further research is needed to evaluate the pharmacokinetics in Asian pediatric and adult patients with NF1 whether they have different pharmacokinetics from those of Western patients. More than 200 patients with NF1 are being followed up in NF clinic of Medical Genetics Center, Asan Medical Center, Seoul, Korea (MGAMC) and up to 20% of patients suffer from PN.

## Rationale for study design, doses and control groups

The administration of selumetinib decreases the size of PN. On the other hand, the pharmacokinetic property of selumetinib might be different in Asian (Korean) populations compared to that of non-Asian groups. The genotype of NF1, Kinome activity and epigenetic factors might underlie the individual difference of selumetinib response in patients with NF1 and PN.

Study design:

This study is an Open-Label, prospective study as the previous study by Dombi et al. (17). Because NF1 is a rare genetic disease, a variety of individual difference exists regarding the severity of PN, and there is no standard treatment recommended, either randomization or comparison with a control group will not be considered in this study.

Primary outcome measures:

- To evaluate the safety of selumetinib in Korean patients with NF1 and PN and pharmacokinetic analysis

Secondary outcome measures:

- To determine the effect of selumetinib on the volume reduction of PN using MRI analysis. (The decrease in volume (*≥*20% of target PN).
- To assess quality of life in patients with NF1 and PN after administration of selumetinib
- To measure changes in Kinome activity by Kinase array (from baseline to 1 and 2 yrs)
- To measure changes of transcriptome profiles by gene expression array (from baseline to 1 and 2 yrs)
- To measure changes in neurofunctional images (from baseline to 1 and 2 yrs)
- To measure changes in neuropsychiatric function (from baseline to 1 and 2 yrs)
- To describe the correlation of clinical response to selumetinib with germline NF1 genotype.

Dosing and study duration:

In the recent study by Dombi et al (17), the maximum tolerated dose of selumetinib was 25 mg per square meter for 24 children with NF1 and PN, which was equivalent to 60% of adult dose. The median number of cycles was 30 (range, 6 to 56). The maximum tolerated dose of selumetinib for adult patients is 50 mg/dose q 12 hrs according to IB. On the other hand, Asian ethnic group is suggested to have higher exposure of selumetinib than non-Asian group.

Therefore, the dosing and study duration of selumetinib in the current study will be as follows:

- Patients with age ≥ 3 years and ≤18 years: 20-25 mg/m2/dose q 12 hrs

*The pediatric patients will be divided into two different dosing groups; one group will be treated with lower dosage of selumetinib (20 mg/m2/dose q 12 hrs) and the other group with higher dosage (25 mg/m2/dose q 12 hrs)*

- Patients with age > 18 years: 50 mg/dose q 12 hrs
- 28 days /cycle x 26 cycles (2 years)

## Benefit/risk and ethical assessment

The primary risk to patients participating in this research study is from toxicity of selumetinib, an investigational agent. The protocol provides for detailed and careful monitoring of all patients to assess for toxicity. Toxicity data from the current dose level will be collected and reviewed to ensure that there were no severe (dose-limiting) toxicities. In the previous phase I and II studies by Dombi et al. (17), responses of reduction of PN have been maintained in patients who did not require dose reductions for toxicity, while no patient has experienced progressive disease. However, when the treatment by selumetinib was stopped, the disease progression or regrowth of plexiform neurofibroma was noted. The potential benefits from this therapy are disease stabilization or shrinkage and a reduction in symptoms including pain and quality of life (QOL).

Patients of Asian descent may experience a higher exposure of selumetinib than the majority of subjects of non-Asian descent receiving an equivalent dose of selumetinib. These patients will receive standard dosing but will be counselled regarding this higher drug exposure and urged to contact investigators if they are experiencing any side effects. The data so far do not suggest a safety concern in any specific population.

Therefore, this research study, at this time, involves greater than minimal risk but presents the prospect of direct benefit to the individual (child and adult) subjects involved in the research.

## Study Design

## Figure 1. Study flow chart


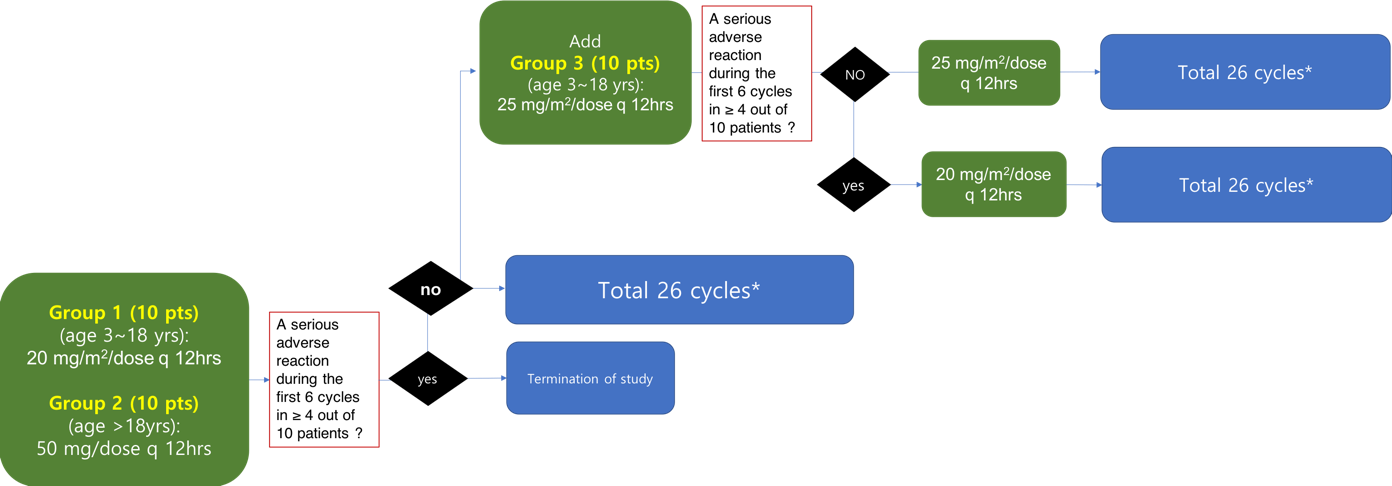


This is a phase II trial of selumetinib administered orally BID (approximately every 12 hours) on a continuous dosing schedule for Korean patients with NF1 and inoperable PN.

In the initial stage, a total of 10 evaluable pediatric (age 3 −18 yrs, group1) and 10 adult Korean patients (age >18 yrs, group2) are to be entered. The 10 pediatric patients will be treated with 20 mg/m2/dose q 12 hrs and the 10 adult patients with 50 mg/dose q 12 hrs. If there is no serious adverse reaction (see below) directly related to selumetinib administration for the first six cycles in 6 out of 10 patients, another 10 pediatric patients (age 3 −18) will be treated with 25 mg/m2/dose q 12 hrs. If we see a serious adverse reaction directly related to selumetinib administration in 4 out of 10 patients, the dose will be reduced from 25 to 20 mg/m2/dose q 12 hrs.

The dose of 50 mg per dose q 12 hrs will be maintained in group 2 unless we do see any serious adverse reaction directly related to selumetinib administration in 4 out of 10 patients.

* Adverse events will be identified and graded using the NCI Common Toxicity Criteria version 4 (CTCAE-4). A serious adverse event is defined as an adverse event occurring during any study phase (i.e., run-in, treatment, washout, follow-up), that fulfils one or more of the following criteria:

- Results in death
- Is immediately life-threatening
- Results in persistent or significant disability/incapacity or substantial disruption of the ability to conduct normal life functions
- Is an important medical event that may jeopardise the subject or may require medical intervention to prevent one of the outcomes listed above

# Study objectives

## Primary objective

| **Primary Objective:** | **Outcome Measure:** |
| --- | --- |
| *To evaluate the safety of selumetinib in Korean patients with NF1 and PN and pharmacokinetic analysis* | Safety analysis  - All AEs, including clinically significant abnormal findings on laboratory evaluations, regardless of severity, will be followed until satisfactory resolution. Adverse events will be identified and graded using the NCI Common Toxicity Criteria version 4 (CTCAE-4), and it will be determined if the adverse event is related to the medical treatment (attribution).   - History, physical exam, vital signs: q 2wks (baseline ~ cycle 3), and then after q 1 cycle - CBC with differential counts, chemistry, phosphorus, electrolytes, magnesium, CPK, urinalysis with micro: every other week (baseline ~ cycle 3), and then after q 3 cycles - EKG and echocardiography: prior to cycle 1, 4, 7, and then after every 6 cycles (13, 19 etc.) - Ophthalmology exam – A complete ophthalmology evaluation at baseline and then after every 6 cycles (13, 29 etc.)   - Plasma samples for the evaluation of selumetinib pharmacokinetics will be obtained prior to and after the first dose of selumetinib, and at steady state during the first treatment cycle. |

## Secondary objectives

| **Secondary Objective:** | **Outcome Measure:** |
| --- | --- |
| *To determine the effect of selumetinib on the volume reduction of PN using MRI analysis. (The decrease in volume (*≥*20%) of target PN)* | Objective response rate (defined as PN decrease ≥20% compared to baseline) using read 3D MRI volumetric analysis |
| *To assess quality of life and pain in patients with NF1 and PN after administration of selumetinib* | A validated disease-specific questionnaire to measure QOL, pain, physical functioning and comorbidities in patients with NF1 will be used (PedsQL and NPS/WBS for patients 18 years of age and INF1-QOL/KNPQ for patients >18 years of age and older). |
| *To measure changes in Kinome activity by Kinase array (from baseline to 1 and 2 yrs)* | Measurement of human phosphor-kinase array in the peripheral blood mononuclear cells (PBMC) from baseline, cycle 7, 13 and 26 |
| *To measure changes of transcriptome profiles by gene expression array (from baseline to 1 and 2 yrs)* | Measurement of human transcriptome profiles in the PBMC from baseline, cycle 7,13 and 26 |
| *To measure changes in neurofunctional images (from baseline to 1 and 2 yrs)* | Functional Brain MRI: prior to cycle 1, and then after every 12 cycles (13 and 26) |
| *To measure changes in neuropsychiatric function (from baseline to 1 and 2 yrs)* | Neuropsychiatric test: prior to cycle 1, and then after every 12 cycles (13 and 26) |
| *To describe the correlation of clinical response to selumetinib with germline NF1 genotype* | Genotype and phenotype correlation between NF1 mutation and response rate of PN reduction by selumetinib. |

# SUBJECT SELECTION, enrolment, randomisation, restrictions, discontinuation and WITHDRAWAL

Each subject should meet all of the inclusion criteria and none of the exclusion criteria for this study. Under no circumstances can there be exceptions to this rule.

## Inclusion criteria

For inclusion in the study subjects should fulfil the following criteria based on local regulations:

*1. Patients with NF1, in whom genetic study was performed for the germline NF1 mutations, and* *have significant symptoms/comorbidities as well as those with the potential to develop symptoms/comorbidities due to inoperable measurable PN .*

*2. Patients must have at least one measurable PN, defined as a lesion of at least 3 cm measured in one dimension.*

*3. Patients with an absolute neutrophil count ≥1000/μL, hemoglobin ≥ 9g/dL, and platelet ≥ 100,000/μL.*

*4. Patients must have bilirubin within 1.5 x the upper limit of normal for age, with the exception of Gilbert syndrome, and ALT and AST within ≤ 1.5 x upper limit of normal.*

*5. Renal Function: age-adjusted normal serum creatinine.*

*6. Cardiac function: Normal ejection fraction*; echocardiogram [EchoCG]) 55% (if a range is given then the upper value of the range will be used).

*7. Performance status: Patients ≥ 16 years of age must have a Karnofsky performance level of ≥70%, and children < 16 years old must have a Lansky performance of ≥70%*

*8. Diagnostic or laboratory studies performed exclusively to determine eligibility for this trial must only be done after obtaining written informed consent from all patients or their legal guardians (if the patient is <19 years old). When appropriate, pediatric patients will be included in all discussions.*

## Exclusion criteria

Subjects should not enter the study if any of the following exclusion criteria are fulfilled:

1. *Any prior exposure to MEK, RASs, or RAF inhibitors, or any treatment regimen that involves the comparator / combination medications.*
2. *Known severe hypersensitivity to selumetinib, comparator or combination medications or any excipient of these medicinal products or history of allergic reactions attributed to compounds of similar chemical or biologic composition to selumetinib or comparator*
3. *Have received or are receiving an investigational medicinal product (IMP) or other systemic anticancer treatment within 4 weeks.*
4. *Have had recent major surgery within a minimum 4 weeks prior to starting study treatment, with the exception of surgical placement for vascular access.*
5. *The last radiation therapy within 4 weeks prior to starting study treatment, or limited field of radiation for palliation within 7 days of the first dose of study treatment.*
6. *Evidence of a malignant glioma, malignant peripheral nerve sheath tumor, or other cancer requiring treatment with chemotherapy or radiation therapy.*
7. *Any unresolved toxicity ≥ CTCAE Grade 2 from previous anti-cancer therapy, except for alopecia*
8. *Cardiac conditions as follows:*
   1. *Uncontrolled hypertension (BP ≥ 150/95 mmHg despite medical therapy)*
   2. *Acute coronary syndrome within 6 months prior to starting treatment*
   3. *Uncontrolled Angina - Canadian Cardiovascular Society grade II-IV despite medical therapy*
   4. *Symptomatic heart failure NYHA Class II-IV, prior or current cardiomyopathy, or severe valvular heart disease*
   5. *Prior or current cardiomyopathy including but not limited to the following:*
      1. *Known hypertrophic cardiomyopathy*
      2. *Known arrhythmogenic right ventricular cardiomyopathy*
   6. *Previous moderate or severe impairment of left ventricular systolic function (LVEF <45% on echocardiography or equivalent on MUGA) even if full recovery has occurred.*
   7. *Severe valvular heart disease*
   8. *Baseline Left ventricular ejection fraction (LVEF) below the LLN or <55% measured by echocardiography or institution’s LLN for MUGA*
   9. *Atrial fibrillation with a ventricular rate >100 bpm on ECG at rest*
   10. *QTcF >450ms or other factors that increase the risk of QT prolongation*
9. *Laboratory values as listed below (SI units):*
   1. *Absolute Neutrophil Count <1.5x109/L (1500 per mm3)*
   2. *Platelets <100x109/L (100,000 per mm3)*
   3. *Hemoglobin ≤9.0 g/dL*
   4. *Serum creatinine ≤1.5 X upper limit of normal (ULN)*
   5. *Serum bilirubin >1.5 x ULN (Note that this will not apply to patients with confirmed Gilbert’s syndrome (persistent or recurrent hyperbilirubinemia that is predominantly unconjugated in the absence of evidence of hemolysis or hepatic pathology), who may be allowed included in specific studies, at the discretion of the doctor / physician responsible for the treatment.)*
   6. *AST or ALT > 2.5 x ULN for patients with no liver metastasis.*
   7. *AST or ALT > 5 x ULN for patients with liver metastasis.*
   8. *AST or ALT > 3.5 x ULN and < 5 x ULN for patients with liver metastasis and ALP > 6 x ULN*
10. *Ophthalmological conditions as follows:*
    1. *Current or past history of retinal pigment epithelial detachment (RPED)/central serous retinopathy (CSR) or retinal vein occlusion*
    2. *Intraocular pressure (IOP) > 21 mmHg or uncontrolled glaucoma (irrespective of IOP). Patients with known glaucoma and increased IOP who do not have meaningful vision (light perception only or no light perception) and are not experiencing pain related to the glaucoma, may be eligible after discussion with the study chair.*
    3. *Ophthalmological findings secondary to long-standing optic pathway glioma (such as visual loss, optic nerve pallor or strabismus) or longstanding orbito-temporal PN (such as visual loss, strabismus) will NOT be considered a significant abnormality for the purposes of the study*
11. *Have evidence of any other significant clinical disorder or laboratory finding that, as judged by the investigator, makes it undesirable for the patient to participate in the study.*
12. *Inability to swallow capsules, since capsules cannot be crushed or broken.*
13. *Inability to undergo MRI and/or contraindication for MRI examinations.*
14. *Prosthesis or orthopedic or dental braces that would interfere with volumetric analysis of target PN on MRI.*
15. *Have any evidence of a severe or uncontrolled systemic disease (e.g. unstable or uncompensated respiratory, cardiac, hepatic, or renal disease, active infection (including hepatitis B, hepatitis C, HIV), active bleeding diatheses or renal transplant.*
16. *Have refractory nausea and vomiting, chronic gastrointestinal diseases (e.g., inflammatory bowel disease), or significant bowel resection that would adversely affect the absorption / bioavailability of the orally administered study medication.*
17. *Male or female patients of reproductive potential and, as judged by the investigator, are not employing an effective method of birth control.*
18. *Female patients who are breast-feeding.*
19. *Supplementation with vitamin E greater than 100% of the daily recommended dose.*
20. *While not an exclusion criterion, unless clinically indicated, patients should avoid taking other additional non-study medications that may interfere with the study medications; in particular, patients should avoid medications that are known to either induce or inhibit the activity of hepatic microsomal isoenzymes CYP1A2, CYP2C19 and CYP3A4*
21. *Patients who in the opinion of the investigator may not be able to comply with the safety monitoring requirements of the study.*

Procedures for withdrawal of incorrectly enrolled subjects see Section 3.4.

## Subject enrolment and randomization

Investigator(s) should keep a record, the subject screening log, of subjects who entered pre-study screening.

The Investigator(s) will:

1. Obtain signed informed consent from the potential subject or their guardian/legal representative before any study specific procedures are performed.
2. Assign potential subject a unique enrolment number.
3. Determine subject eligibility. See Section 3.

## Procedures for handling incorrectly enrolled subjects

Subjects who fail to meet the eligibility criteria should not, under any circumstances, be enrolled or receive study medication. There can be no exceptions to this rule. Subjects who are enrolled, but subsequently found not to meet all the eligibility criteria must not be initiated on treatment, and must be withdrawn from the study.

## Methods for assigning treatment groups

This study is a single-arm, phase II study, and there is no randomization. In the initial stage, a total of 10 evaluable pediatric (group 1) and 10 adult Korean patients (group 2) are to be entered. The 10 pediatric patients will be treated with 20 mg/m2/dose q 12 hrs and the 10 adult patients with 50 mg/dose q 12 hrs. If there is no serious adverse reaction in 6 out of 10 patients for the first six cycles, another 10 pediatric patients (group 3) will be treated with 25 mg/m2/dose q 12 hrs. If we see a serious adverse reaction in 4 out of 10 group 3, the dose will be reduced from 25 to 20 mg/m2/dose q 12 hrs in group 3.

In conclusion, a total of 30 patients will be enrolled in this study. However, the number of patients can be expanded based on the availability of selumetinib.

## Discontinuation of investigational product

Subjects may be discontinued from investigational product (IP) in the following situations:

- Subject decision. The subject is at any time free to discontinue treatment, without prejudice to further treatment (reasons must be noted on the patient’s CRF).
- Serious protocol violation as determined by the PI.
- Any patient who develops a toxicity requiring dose modification which does not resolve to meet study parameters within 21 days of drug discontinuation.
- A patient who develops a concurrent serious medical condition that might preclude or contraindicate the further administration of selumetinib.
- A patient who becomes pregnant will be immediately taken off therapy.
- A patient who will undergo complete surgical resection of their PN (thus rendering them with no evidence of disease).

*If the subject is discontinued from investigational product, the scheduled study visits, data collection and procedures should continue according to the study protocol until study closure. Alternatively, if the subject does not agree to this option, a modified follow up through e.g., regular telephone contacts or a contact at study closure should be arranged, if agreed to by the subject and in compliance with local data privacy laws/practices. The approach taken should be registered in the CRF.*

### Procedures for discontinuation of a subject from investigational product

At any time, subjects are free to discontinue investigational product or withdraw from the study (i.e., investigational product and assessments – see Section 3.7), without prejudice to further treatment. A subject that decides to discontinue investigational product will always be asked about the reason(s) and the presence of any adverse events. If possible, they will be seen and assessed by an Investigator(s). Adverse events will be followed up until stabilization or resolution (See Section 6) and all study drugs should be returned by the subject.

However, if a patient removed from treatment develops PN volume increase ≥15% after discontinuation of selumetinib, this patient may restart selumetinib provided all other criteria for continuation of therapy apply. In these patients, treatment may continue as long as the PN remains stable or responsive (<20% increase in PN volume).

If a subject is withdrawn from study, see Section 3.7.

## Criteria for withdrawal

### Screen failures

Screening failures are patients who do not fulfil the eligibility criteria for the study, and therefore must not be enrolled. These patients should have the reason for study withdrawal recorded as ‘Incorrect Enrolment’ (i.e., patient does not meet the required inclusion/exclusion criteria). This reason for study withdrawal is only valid for screen failures.

### Withdrawal of the informed consent

Patients are free to withdraw from the study at any time (investigational product and assessments), without prejudice to further treatment.

A patient who withdraws consent will always be asked about the reason(s) and the presence of any adverse events (AE). The Investigator will follow up AEs outside of the clinical study.

## Discontinuation of the study

The study may be stopped if, in the judgment of the PI, trial subjects are placed at undue risk because of clinically significant findings that:

- meet individual stopping criteria or are otherwise considered significant
- are assessed as causally related to study drug,
- are not considered to be consistent with continuation of the study

Regardless of the reason for termination, all data available for the subject at the time of discontinuation of follow-up must be recorded in the CRF. All reasons for discontinuation of treatment must be documented.

In terminating the study, the PI will ensure that adequate consideration is given to the protection of the subjects’ interests.

#

| Table 1. Study Plan detailing the procedures |
| --- |

# Study plan and timing of procedures

| Cycle |  | 1 | | | 2 | | 3 | | 4 | 5 | 6 | 7 | 8 | 9 | 10 | 11 | 12 | 13 |
| --- | --- | --- | --- | --- | --- | --- | --- | --- | --- | --- | --- | --- | --- | --- | --- | --- | --- | --- |
| Visit (V) | V1  (Baseline) | V2 | V3 | V4 | V5 | V6 | V7 | V8 | V9 | V10 | V11 | V12 | V13 | V14 | V15 | V16 | V17 | V18 | |
| Week |  | 0 | 1 | 2 | 4 | 6 | 8 | 10 | 12 | 16 | 20 | 24 | 28 | 32 | 36 | 40 | 44 | 48 | |
| Window period (days) | –28 to 0 | ± 2 | ± 2 | ±2 | ± 2 | ±2 | ± 2 | ±2 | ± 4 | ± 4 | ± 4 | ± 4 | ± 4 | ± 4 | ± 4 | ± 4 | ± 4 | ± 4 | |
| Written informed consent *(including tissue samples, pharmacokinetics*) | **√** |  |  |  |  |  |  |  |  |  |  |  |  |  |  |  |  |  | |
| Demographics | **√** |  |  |  |  |  |  |  |  |  |  |  |  |  |  |  |  |  | |
| Physical examination, height, and weight | **√** | **√** | **√** | **√** | **√** | **√** | **√** | **√** | **√** | **√** | **√** | **√** | **√** | **√** | **√** | **√** | **√** | **√** | |
| Medical/surgical history | **√** | **√** | **√** | **√** | **√** | **√** | **√** | **√** | **√** | **√** | **√** | **√** | **√** | **√** | **√** | **√** | **√** | **√** | |
| Inclusion/exclusion criteria | **√** |  |  |  |  |  |  |  |  |  |  |  |  |  |  |  |  |  | |
| Vital signs | **√** | **√** | **√** | **√** | **√** | **√** | **√** | **√** | **√** | **√** | **√** | **√** | **√** | **√** | **√** | **√** | **√** | **√** | |
| Concomitant medication | **√** | **√** | **√** | **√** | **√** | **√** | **√** | **√** | **√** | **√** | **√** | **√** | **√** | **√** | **√** | **√** | **√** | **√** | |
| Adverse event review (AEs and SAEs) | **√** | **√** | **√** | **√** | **√** | **√** | **√** | **√** | **√** | **√** | **√** | **√** | **√** | **√** | **√** | **√** | **√** | **√** | |
| Blood samples for haematology and clinical chemistry | **√** | **√** |  | **√** | **√** | **√** | **√** | **√** |  |  |  | **√** |  |  | **√** |  |  | **√** | |
| Urinalysis | **√** | **√** |  | **√** | **√** | **√** | **√** | **√** |  |  |  | **√** |  |  | **√** |  |  | **√** | |
| 12-lead ECG and Echocardiography | **√** |  |  |  |  |  |  | **√** |  |  |  | **√** |  |  |  |  |  | **√** | |
| Urine or serum pregnancy test | **√** |  |  |  |  |  |  |  |  |  |  |  |  |  |  |  |  |  | |
| Blood sampling for pharmacokinetics |  | **√** |  |  |  |  |  |  |  |  |  |  |  |  |  |  |  |  | |
| Volumetric whole body MRI | **√** |  |  |  |  |  |  |  |  |  |  | **√** |  |  |  |  |  | **√** | |
| Functional Brain MRI | **√** |  |  |  |  |  |  |  |  |  |  |  |  |  |  |  |  | **√** | |
| Neuropsychiatric test | **√** |  |  |  |  |  |  |  |  |  |  |  |  |  |  |  |  | **√** | |
| Ophthalmology evaluation | **√** |  |  |  |  |  |  |  | **√** |  |  |  |  |  |  |  |  | **√** | |
| QOL and Pain assessment | **√** |  |  |  |  |  |  |  |  |  |  | **√** |  |  |  |  |  | **√** | |
| Kinome and transcriptome analysis | **√** |  |  |  |  |  |  |  |  |  |  | **√** |  |  |  |  |  | **√** | |
| Growth assessment | **√** |  |  |  |  |  |  |  |  |  |  | **√** |  |  |  |  |  | **√** | |
| Patient diary |  | **daily** | | | | | | | | | | | | | | | | | |
| Pill count |  | **√** | **√** | **√** | **√** | **√** | **√** | **√** | **√** | **√** | **√** | **√** | **√** | **√** | **√** | **√** | **√** | **√** | |

| Cycle | 14 | 15 | 16 | 17 | 18 | 19 | 20 | 21 | 22 | 23 | 24 | 25 | 26 |  | For details see Protocol Section |
| --- | --- | --- | --- | --- | --- | --- | --- | --- | --- | --- | --- | --- | --- | --- | --- |
| Visit (V) | V19 | V20 | V21 | V22 | V23 | V24 | V25 | V26 | V27 | V28 | V29 | V30 | V31 | V32 (EOS) |
| Week | 52 | 56 | 60 | 64 | 68 | 72 | 76 | 80 | 84 | 88 | 92 | 96 | 100 | 104 |
| Window period (days) | ± 4 | ± 4 | ± 4 | ± 4 | ± 4 | ± 4 | ± 4 | ± 4 | ± 4 | ± 4 | ± 4 | ± 4 | ± 4 | ± 14 |
| Written informed consent *(including tissue samples, pharmacokinetics*) |  |  |  |  |  |  |  |  |  |  |  |  |  |  |  |
| Demographics |  |  |  |  |  |  |  |  |  |  |  |  |  |  |  |
| Physical examination, height, and weight | **√** | **√** | **√** | **√** | **√** | **√** | **√** | **√** | **√** | **√** | **√** | **√** | **√** | **√** | **4.1.1.** |
| Medical/surgical history | **√** | **√** | **√** | **√** | **√** | **√** | **√** | **√** | **√** | **√** | **√** | **√** | **√** | **√** | **4.1.1.** |
| Inclusion/exclusion criteria |  |  |  |  |  |  |  |  |  |  |  |  |  |  |  |
| Vital signs | **√** | **√** | **√** | **√** | **√** | **√** | **√** | **√** | **√** | **√** | **√** | **√** | **√** | **√** |  |
| Concomitant medication | **√** | **√** | **√** | **√** | **√** | **√** | **√** | **√** | **√** | **√** | **√** | **√** | **√** | **√** |  |
| Adverse event review (AEs and SAEs) | **√** | **√** | **√** | **√** | **√** | **√** | **√** | **√** | **√** | **√** | **√** | **√** | **√** | **√** |  |
| Blood samples for haematology and clinical chemistry |  |  | **√** |  |  | **√** |  |  | **√** |  |  |  |  | **√** | **4.1.2.** |
| Urinalysis |  |  | **√** |  |  | **√** |  |  | **√** |  |  |  |  | **√** | **4.1.2.** |
| 12-lead ECG and Echocardiography |  |  |  |  |  | **√** |  |  |  |  |  |  |  | **√** | **4.1.3.** |
| Urine or serum pregnancy test |  |  |  |  |  |  |  |  |  |  |  |  |  |  | **4.1.4.** |
| Blood sampling for pharmacokinetics |  |  |  |  |  |  |  |  |  |  |  |  |  |  | **4.1.5.** |
| Volumetric whole body MRI |  |  |  |  |  | **√** |  |  |  |  |  |  |  | **√** | **4.1.6.** |
| Functional Brain MRI |  |  |  |  |  |  |  |  |  |  |  |  |  | **√** | **4.1.7.** |
| Neuropsychiatric test |  |  |  |  |  |  |  |  |  |  |  |  |  |  | **4.1.8.** |
| Ophthalmology evaluation |  |  |  |  |  |  |  |  |  |  |  |  |  | **√** | **4.1.9.** |
| QOL and Pain assessment |  |  |  |  |  | **√** |  |  |  |  |  |  |  | **√** | **4.1.10.** |
| Kinome and transcriptome analysis |  |  |  |  |  |  |  |  |  |  |  |  |  | **√** | **4.1.11.** |
| Tanner stage, Bone age, Skeletal survey x-ray, IGF1, IGF-BP3 |  |  |  |  |  | **√** |  |  |  |  |  |  |  | **√** | **4.1.12.** |
| Patient diary | **daily** | | | | | | | | | | | | | |  |
| Pill count | **√** | **√** | **√** | **√** | **√** | **√** | **√** | **√** | **√** | **√** | **√** |  |  | **√** |  |

##

## Enrolment/screening period

Procedures will be performed according to the Study Plan. At screening, consenting subjects are assessed to ensure that they meet eligibility criteria. Subjects who do not meet these criteria must not be enrolled in the study.

If relevant, all subjects will be required to provide consent to supply a sample of their biological sample for entry into this study. This consent is included in the main subject informed consent form.

Pre-treatment blood test should be performed within 2 weeks and imaging studies within 4 weeks prior to enrollment on the trial unless otherwise stated.

1. History and physical examination: Complete history, including prior and concurrent therapy and all documented previous height and weight measurements and growth curve if available; physical examination including documentation of measurable disease, performance status, blood pressure, height, weight, body surface area (BSA), and signs and symptoms.
2. Hematology: Complete blood count with differential and platelets. Chemistries: Electrolytes (including sodium, potassium, chloride, CO2), calcium, phosphorus, magnesium, creatinine, BUN, glucose, ALT, AST, bilirubin, urinalysis, total protein, albumin, and CPK.
3. EKG/EchoCG: Electrocardiogram and echocardiography to be performed within 2 weeks prior to enrollment on the trial.
4. Urine or serum pregnancy test for all females of childbearing potential (females greater than 9 years of age or those showing pubertal development). This test is to be performed within 72 hours prior to enrollment.
5. Pharmacokinetics: Plasma samples for the evaluation of selumetinib pharmacokinetics will be obtained prior to and after the first dose of selumetinib, and at steady state during the first treatment cycle only as outlined in appendix A. PK parameters (CL/F and V/F) and exposure parameters (Cmax and AUC) will be described. Pharmacokinetic analysis will be conducted using non-­compartmental methods and estimated pharmacokinetic parameters including AUC, clearance, half-­life and volume of distribution presented for each dose level using summary statistics (mean, standard deviation, median and range).
6. An MRI scan of the entire inoperable PN within 4 weeks of enrollment on study. In addition, if possible, an MRI scan of all known additional, measurable PN within 4 weeks of enrollment on study. The imaging protocol outlined in appendix B.
7. Brain MRI including resting status functional MRI (rsfMRI) will be done within 4 weeks of enrollment on study. Brain MRI will be done using a 3 tesla MRI scanner (Achieva; Philips Healthcare, Best, the Netherlands) with an eight-channel, sensitivity-encoding head coil. Three-dimensional T1-weighted imaging (T1WI) sequence and DTI using a single-shot echo-planar imaging (EPI) will be acquired. Sedation will be done by trained anesthesiologists according to our institutional standard protocol.
8. Neuropsychiatric test: Korean Wechsler Preschool and Primary Scale of Intelligence (K-WPPSI) will be done for patients < age 6 years, Korean Wechsler intelligence scale for children-fourth edition (K-WISC-IV) will be done for patients with age 6-15 years and Korean Wechsler adult intelligence scale-fourth edition (K-WAIS-IV) will be done for patients age 16 years. Verbal comprehension index (VCI), perceptual reasoning index (PCI), working memory index (WMI), processing speed index (PSI) an full scale IQ (FSIQ) will be measured. Advanced test of attention (ATA) will be done for patients with age 5-18 years. Seoul Computerized Neurocognitive Function Test (SCNT) will be done for patients age 19 years.
9. Ophthalmology evaluation: A complete ophthalmology evaluation will be performed pre-treatment. Particular emphasis will be given to the evaluation of corneal opacification.
10. QOL and Pain assessment: PedsQL 4.0 Generic Core Scales are multidimensional child self-report and parent proxy-report scales to assess health-related quality of life (QOL) in children, adolescents, and young adults aged 2 – 25 years. INF1-QOL for patients >18 years old. Korean Neuropathic Pain Questionnaire (KNPQ) for adults >18 years of age and Numeric Pain Rating Scale (NPS)/Wong-Baker Faces Pain Rating Scale (WBS) for patients with 18 years of age will used for pain assessment.
11. Kinome and transcriptome analysis: PBMC will be collected and kept in -70 C° (Appendix C).

4.1.12. Tanner stage, Bone age (lt. wrist), Skeletal survey x-rays (Whole both upper and lower extremities AP/LAT, whole spine AP/LAT), blood IGF1 and IGF-BP3 levels will be measured.

## Treatment period

See the Section 4.1.

## Follow-up period

See the Section 4.1.

# study assessments

The Investigator will ensure that data are recorded on the paper Case Report Forms as specified in the study protocol and in accordance with the instructions provided.

The Investigator ensures the accuracy, completeness, legibility and timeliness of the data recorded and of the provision of answers to data queries according to the Research Agreement. The Investigator will sign the completed paper Case Report Forms. A copy of the completed paper Case Report Forms will be archived at the study site.

The MGAMC will coordinate the clinical trial and data collection. Documentation and date of IRB approval must be provided to the MGAMC prior to initial patient entry from the institution.

5.1.1 Case Report Forms

A study number, not names or initials will identify all case report forms and patient diaries. This will be done to protect patient confidentiality. Unless otherwise stated, all forms should be submitted to:

Beom Hee Lee, M.D., Ph.D.

Fax: 82-2-3010-4702

Phone: 82-2-3010-5950

Address: Medical Genetics Center, Asan Medical Center

Olympic-ro 43-gil-88, Songpa-gu, Seoul, Korea 05505

Case Report Forms: Case report forms will be completed within 2 weeks of each required evaluation.

Patient Diaries for side effects and adherence: Patients or their guardians must keep a diary to document the intake of each dose of selumetinib and potential side effects. These diaries will be forwarded to coordinator after each treatment cycle. A pill count will be performed with each restaging.

## Efficacy assessments

### Volumetric whole body MRI:

Baseline, Visit 12, 18, 24, and 32. The imaging protocol outlined in appendix B.

### Functional Brain MR and Neuropsychiatric test:

Baseline, Visit 18, and 32.

### Quality of life and Pain assessment:

Baseline, Visit 12, 18, 23, and 32

Refer section 5.3.1.1.

### Kinome activity:

Baseline, Visit 12, 18 and 32

The human phosphor-kinase profiles will be measured using PROTEOME PROFILER HUMAN PHOSPHO-KINASE ARRAY KIT (R&D Systems, Inc., Minneapolis, MN). The PBMCs from at least 12 patients drawn at baseline, visit 12, 18 and 32 will be used for the test.

### Gene expression array:

Baseline, Visit 12, 18 and 32

The human gene expression profiles will be measured using Affymetrix Human Gene 2.0 ST Array (Thermo Fisher Scientific, Waltham, MA). The PBMCs from at least 12 patients drawn at baseline, visit 12, 18 and 32 will be used for the test.

### Genotype and phenotype correlation:

Baseline and V32 (EOS)

The germline NF1 mutation spectrum and response of PN decrease to selumetinib will be described.

## Safety assessments

### Laboratory safety assessments

Blood and urine samples for determination of clinical chemistry, haematology, and urinalysis will be taken at the times indicated in the Study Plan (see Section 4).

Additional safety samples may be collected if clinically indicated at the discretion of the Investigator. The date, time of collection and results (values, units and reference ranges) will be recorded on the appropriate CRF.

The clinical chemistry, haematology and urinalysis will be performed at a local laboratory at or near to the Investigator site.

The following laboratory variables will be measured:

| Table 2Laboratory Safety Variables | |
| --- | --- |
| Haematology/Haemostasis (whole blood) | Clinical Chemistry (serum or plasma) |
| B-Haemoglobin (Hb) | S/P-Creatinine |
| B-Leukocyte count | S/P-Bilirubin, total |
| B-Leukocyte differential count (absolute count) | S/P-Alkaline phosphatise (ALP) |
| B-Platelet count | S/P-Aspartate transaminase (AST) |
| B - Neutrophils | S/P-Gamma glutamyl transferase (γGT) |
| B - Eosinophils | S/P-Alanine transaminase (ALT) |
| B - Basophils | S/P-Albumin |
| B - Lymphocytes | S/P-Potassium |
| B - Monocytes | S/P-Calcium, total |
|  | S/P-Phosphorus |
| B-INR* | S/P-Magnesium |
| **Urinalysis** (dipstick) | S/P-Sodium |
| U-Hb/Erythrocytes/Blood | S/P-Potassium |
| U-Protein/Albumin | S/P-total CO2 |
| U-Glucose | S/P-Creatine kinase (CK)**  S/P -Troponin (isoform as per institutional norm)***  S/P - Urea nitrogen |

The Investigator should make an assessment of the available results with regard to clinically relevant abnormalities. The laboratory results should be signed and dated and retained at centre as source data for laboratory variables. For information on how AEs based on laboratory tests should be recorded and reported, see Section 6.3.

* For patients receiving warfarin (Coumadin derivatives), INR monitoring should be conducted and recorded in the CRF

** CK to be assessed at screening and if clinically indicated (e.g. muscle symptoms).

*** Troponin (isoform per institution norm), should be assessed at screening to be performed when there is a significant drop in LVEF (of ≥10 percentage points relative to baseline and to an absolute LVEF below the institution’s LLN on study treatment) or any cardiorespiratory events with no obvious diagnosis. If troponin assessments are not available, as per local practice, CK-MB should be assessed. Patients should be managed according to the algorithm provided in section 6.8.

**NB.** In case a subject shows an AST **or** ALT ≥3xULN **or** total bilirubin ≥ 2xULN please refer to Appendix E ‘Actions Required in Cases of Increases in Liver Biochemistry and Evaluation of Hy’s Law’, for further instructions.

### Physical examination

A complete physical examination with vital signs will be performed and include an assessment of the following: general appearance, height, weight, body surface area, respiratory, cardiovascular, abdomen, skin, head and neck (including ears, eyes, nose and throat), lymph nodes, thyroid, abdomen, musculo-skeletal (including spine and extremities) and neurological systems.

Vital signs include blood pressure, pulse rate, respiratory rate, and body temperature.

To be performed on baseline and every visit.

#### 12-lead EKG and echocardiography

EKG will be performed on baseline, V8, V12, V18, V24, and V32 (end of study) and heart rate, P and QRS durations, PR, QT and QTc intervals will be recorded from standard lead of the computerised quantitative 12-lead ECG.

Echocardiography will be performed on baseline, V8, V12, V18, V24, and V32 (end of study). LVEF, end diastolic and end systolic left ventricular volumes should be recorded at each echocardiogram assessment.

Normal ejection fraction (ECHO or cardiac MRI) ≥ 53% (or the institutional normal; if a range is given then the upper value of the range will be used); QTcF ≤450 msec.

Reversible, asymptomatic reductions in LVEF have been recorded in a small number of patients receiving selumetinib in studies with scheduled echocardiography assessments. Evidence of reversibility of LVEF changes on continuing selumetinib (often without therapeutic treatment) has been demonstrated in patients with follow-up assessments available. Patients who have a drop in LVEF of ≥10 percentage points from baseline and to below the lower limit of normal at the time of selumetinib discontinuation should have a follow-up echocardiogram after 30 days to evaluate the potential for reversibility.

See section 6 for management of patients experiencing an asymptomatic but clinically significant drop in LVEF (decrease by > or equal to 10 percentage points relative to baseline and below the institutions LLN). The modality of the cardiac function assessments must be consistent within patient, i.e. if echocardiogram is used for the screening assessment then echocardiogram should also be used for subsequent scans. Concomitant cardiac symptoms should be reported as AEs/serious adverse events (SAEs) accordingly. Cardiac failure should be treated and followed according to local medical practice (See section 6.8.3.).

### Ophthalmological evaluation

Ophthalmology evaluation for corneal opacification: baseline, V8, V18, and V32 (end of study). Best corrected visual acuity, intraocular pressure and slit lamp fundoscopy will be measured.

If a patient experiences AE/symptoms of visual disturbance (including blurring of vision) a complete ophthalmological examination, including a slit-lamp examination, must be performed. If an abnormality is detected, fundus photography and an OCT scan can also be performed where required. (See section 6.8.4. for management of visual changes)

If retinal abnormality prior to or at time of selumetinib discontinuation has been observed a repeat ophthalmological examination is to be performed 30 days after discontinuation of selumetinib in order to document reversibility.

### Bone growth assessment

Growth assessment for active monitoring for the potential risk of physeal dysplasia as per considerations document (targeted clinical exam, growth chart monitoring and imaging)

Physical examination for height and weight (standard deviation score), growth velocity, tanner stage, and bone age, bony dysplasia, IGF1 and IGFBP3 will be measured: Baseline, V6, V12, V18, V24, and V32

## Other assessments

### Patient reported outcomes

In participants with plexiform neurofibromas in all locations, this study will assess general health related qualify of life (QOL) using patient-reported outcomes (PROs) (See section 5.3.1.1).

#### General Health-Related Quality of Life

- For patients 18 years old

Pediatric Quality of Life Inventory (PedsQ): The PedsQL 4.0 Generic Core Scales are multidimensional child self-report and parent proxy-report scales to assess health-related quality of life (QOL) in children, adolescents, and young adults ages 2 – 25 years (1). It is a brief standardized pediatric QOL scale with good reliability and validity, which includes both generic and disease specific modules. It consists of a 23-item core measure of global QOL that has four subscales: physical functioning, emotional functioning, social functioning, and school functioning. The domain of physical functioning and co-morbidities will be used as a specific secondary outcome measure for this study, especially the parent proxy for younger children as it assesses children under 6 years of age. There are different forms for parents of patient’s ages 2 – 18 years (toddler: 2 – 4; young child: 5 – 7; child: 8 – 12; adolescent: 13 – 1). It takes approximately 5-10 minutes to complete. For this study, children from 8 to 18 years of age will complete self-report measures of the PedsQL, and parents or legal guardians of children from 2 to 18 years of age will complete the parent proxy measures of the PedsQL.

- For patients >18 years old

The Impact of NF1 on Quality of Life (INF1-QOL) questionnaire (INF1-QOL) (2): INF1-QOL is a validated neurofibromatosis-1 specific questionnaire, which consists of 14 questions which measure QOL, physical functioning and comorbidities in NF1 patients. INFI-QOL correlates moderately with clinical severity. The moderate relationship between INF1-QOL and physician rated severity emphasizes the difference between clinical and patient perception. It takes approximately 5-10 minutes to complete.

## Pharmacokinetics

Pharmacokinetic evaluation will be performed in all the patients (20 pediatric, 10 adults) during cycle 1, with dose 1 and at steady state prior to cycle #2 as described in Appendix A. Pharmacokinetic analysis will be conducted using non-­compartmental methods and estimated pharmacokinetic parameters including AUC, clearance, half-­life and volume of distribution presented for each dose level using summary statistics (mean, standard deviation, median and range).

### Collection of samples

For each PK sample, 3 ml of whole blood will be collected in a lavender top tube according to the following schedule: 1) Relative to the first oral dose on day 1: before the first oral dose, 0.5h, 1h, 2h, 3h, 5h, 8h, 10 to 12h, and 30 to 36h following the first oral dose. 2) In addition, on day 27 – 28 before the first dose for cycle #2.

### Determination of drug concentration

Drug concentration in plasma will be analysed by AstraZeneca

### Storage and destruction of pharmacokinetic samples

Pharmacokinetic (PK) samples will be disposed of after the Bioanalytical Report finalization or six months after issuance of the draft Bioanalytical Report (whichever is earlier), unless requested for future analyses.

Pharmacokinetic samples may be disposed of or destroyed and anonymised by pooling. Additional analyses may be conducted on the anonymised, pooled pharmacokinetic samples to further evaluate and validate the analytical method.  Any results from such analyses may be reported separately from the CSR.

Incurred sample reproducibility analysis, if any, will be performed alongside the bioanalysis of the test samples.  The results from the evaluation will not be reported in the Clinical Study Report but separately in a Bioanalytical Report.

Any residual back-up PK samples may be used for future exploratory biomarker research.

### Storage, re-use and destruction of pharmacodynamic samples

Samples will be stored for a maximum of 15 years from the date of the Last Subject’s Last Visit, after which they will be destroyed. The results of any investigation will be reported either in the Clinical Study Report itself or as an addendum, or separately in a scientific report or publication.

## Pharmacogenetics

Pharmacogenetic samples will not be taken during the study

## Biomarker analysis

The subject’s consent to the use of donated biological samples is mandatory.

Biological samples (plasma) will be collected and may be analysed for exploratory biomarkers to assess correlations with disease activity, effects of study drug, clinical outcomes and toxicity.

### Storage, re-use and destruction of biological samples

Samples will be stored for a maximum of 15 years from the date of the Last Subject’s Last Visit, after which they will be destroyed. The results of this biomarker research will be reported either in the Clinical Study Report itself or as an addendum, or separately in a scientific report or publication. The results of this biomarker research may be pooled with biomarker data from other studies with the study drug to generate hypotheses to be tested in future research.

### Withdrawal of Informed Consent for donated biological samples

If a subject withdraws consent to the use of donated biological samples, the samples will be disposed of/destroyed, and the action documented. If samples are already analysed*,* PI is not obliged to destroy the results of this research.

As collection of the biological samples is an optional part of the study, then the subject may continue in the study.

The Principal Investigator:

- Ensures subjects’ withdrawal of informed consent to the use of donated samples is notified immediately
- Ensures that biological samples from that subject, if stored at the study site, are immediately identified, disposed of /destroyed, and the action documented
- Ensures the laboratory(ies) holding the samples is/are informed about the withdrawn consent immediately and that samples are disposed of/destroyed, the action documented and the signed document returned to the study site
- Ensures that the subject and Sponsor are informed about the sample disposal.

Sponsor ensures the central laboratory(ies) holding the samples is/are informed about the withdrawn consent immediately and that samples are disposed of/destroyed and the action documented and returned to the study site.

# safety reporting and medical management

The Principal Investigator is responsible for ensuring that all staff involved in the study are familiar with the content of this section.

## Definition of adverse events

An adverse event is the development of an undesirable medical condition or the deterioration of a pre-existing medical condition following or during exposure to a pharmaceutical product, whether or not considered causally related to the product. An undesirable medical condition can be symptoms (e.g., nausea, chest pain), signs (e.g., tachycardia, enlarged liver) or the abnormal results of an investigation (e.g., laboratory findings, electrocardiogram). In clinical studies, an AE can include an undesirable medical condition occurring at any time, including run-in or washout periods, even if no study treatment has been administered.

The term AE is used to include both serious and non-serious AEs.

## Definitions of serious adverse event

A serious adverse event is an AE occurring during any study phase (i.e., run-in, treatment, washout, follow-up), that fulfils one or more of the following criteria:

- Results in death
- Is immediately life-threatening
- Requires in-patient hospitalization or prolongation of existing hospitalisation
- Results in persistent or significant disability/incapacity or substantial disruption of the ability to conduct normal life functions
- Is a congenital abnormality or birth defect
- Is an important medical event that may jeopardise the subject or may require medical intervention to prevent one of the outcomes listed above.

The causality of SAEs (their relationship to all study treatment/procedures) will be assessed by the Investigator(s) and communicated to Sponsor.

For further guidance on the definition of a SAE, see Appendix F Additional Safety Information to the Clinical Study Protocol.

## Recording of adverse events

### Time period for collection of adverse events

Adverse Events will be collected from enrolment throughout the treatment period and including the follow-up period until the 30 days after the last dose of study drug.

### Follow-up of unresolved adverse events

Any AEs that are unresolved until the 30 days after the study are followed up by the Investigator for as long as medically indicated, but without further recording in the CRF. Company retains the right to request additional information for any subject with ongoing AE(s)/SAE(s) at the end of the study, if judged necessary.

### Variables

The following variables will be collect for each AE;

- AE (verbatim)
- The date when the AE started and stopped
- Select the appropriate as required: maximum intensity or intensity or changes in intensity
- Select the appropriate as required:
- Intensity rating scale:

1 mild (awareness of sign or symptom, but easily tolerated)

2 moderate (discomfort sufficient to cause interference with normal activities)

3 severe (incapacitating, with inability to perform normal activities)

- Alternative intensity rating scale for in-patients:

1 mild (awareness of sign or symptom, but easily tolerated)

2 moderate (disturbing but still tolerable)

3 severe (intolerable)

- Whether the AE is serious or not
- Investigator causality rating against the Investigational Product (yes or no)
- Action taken with regard to investigational product
- Select the appropriate as required: AE caused subject’s withdrawal from study (yes or no)
- Outcome.

In addition, the following variables will be collected for SAEs:

- Date AE met criteria for serious AE
- Date Investigator became aware of serious AE
- AE is serious due to
- Date of hospitalisation
- Date of discharge
- Probable cause of death
- Date of death
- Autopsy performed
- Causality assessment in relation to Study procedure(s)
- Causality assessment in relation to Other medication

It is important to distinguish between serious and severe AEs. Severity is a measure of intensity whereas seriousness is defined by the criteria in Section 6.2. An AE of severe intensity need not necessarily be considered serious. For example, nausea that persists for several hours may be considered severe nausea, but not a SAE unless it meets the criteria shown in Section 6.2. On the other hand, a stroke that results in only a limited degree of disability may be considered a mild stroke but would be a SAE when it satisfies the criteria shown in Section 6.2.

### Causality collection

The Investigator will assess causal relationship between Investigational Product and each Adverse Event, and answer ‘yes’ or ‘no’ to the question ‘Do you consider that there is a reasonable possibility that the event may have been caused by the investigational product?’

For SAEs causal relationship will also be assessed for other medication and study procedures. Note that for SAEs that could be associated with any study procedure the causal relationship is implied as ‘yes’.

A guide to the interpretation of the causality question is found in Appendix F. Additional Safety Information to the Clinical Study Protocol.

### Adverse events based on signs and symptoms

All AEs spontaneously reported by the subject or care provideror reported in response to the open question from the study personnel: ‘Have you/the child had any health problems since the previous visit/you were last asked?’, or revealed by observation will be collected and recorded in the CRF. When collecting AEs, the recording of diagnoses is preferred (when possible) to recording a list of signs and symptoms. However, if a diagnosis is known and there are other signs or symptoms that are not generally part of the diagnosis, the diagnosis and each sign or symptom will be recorded separately.

### Adverse events based on examinations and tests

The results from protocol mandated laboratory tests and vital signs will be summarised in the clinical study report. Deterioration as compared to baseline in protocol-mandated laboratory values, vital signs should therefore only be reported as AEs if they fulfil any of the SAE criteria or are the reason for discontinuation of treatment with the investigational product.

If deterioration in a laboratory value/vital sign is associated with clinical signs and symptoms, the sign or symptom will be reported as an AE and the associated laboratory result/vital sign will be considered as additional information. Wherever possible the reporting Investigator uses the clinical, rather than the laboratory term (e.g., anaemia versus low haemoglobin value). In the absence of clinical signs or symptoms, clinically relevant deteriorations in non-mandated parameters should be reported as AE(s).

Deterioration of a laboratory value, which is unequivocally due to disease progression, should not be reported as an AE/SAE.

Any new or aggravated clinically relevant abnormal medical finding at a physical examination as compared with the baseline assessment will be reported as an AE.

### Hy’s Law

Cases where a subject shows elevations in liver biochemistry may require further evaluation and occurrences of AST or ALT ≥ 3xULN together with total bilirubin ≥ 2xULN may need to be reported as SAEs. Please refer to Appendix E. Actions Required in Cases of Increases in Liver Biochemistry and Evaluation of Hy’s Law for further instruction on cases of increases in liver biochemistry and evaluation of Hy’s Law.

### Disease progression

Disease progression can be considered as a worsening of a subject’s condition attributable to the disease for which the investigational product is being studied. It may be an increase in the severity of the disease under study and/or increases in the symptoms of the disease. Increase of PN volume > 20% by volumetric MRI analysis should be considered as disease progression and not an AE. Events, which are unequivocally due to disease progression, should not be reported as an AE during the study.

## Reporting of serious adverse events to the IRB and/or the Regulatory Authority

All SAEs have to be reported, whether or not considered causally related to the investigational product. Then Investigators are responsible for informing the IRB and/or the Regulatory Authority of the SAE as per local requirements.

The proforma, included as a separate document, may be used to clarify safety reporting responsibilities- please note use of this proforma is optional.

If any SAE occurs in the course of the study, then Investigators or other site personnel inform the appropriate Sponsor representatives within one day i.e., immediately but **no later than 24 hours** of when he or she becomes aware of it.

The designated Sponsor representative works with the Investigator to ensure that all the necessary information is provided to the database **within 1** **calendar day** of initial receipt for fatal and life threatening events **and within 5 calendar** **days** of initial receipt for all other SAEs.

For fatal or life-threatening adverse events where important or relevant information is missing, active follow-up is undertaken immediately. Investigators or other site personnel inform Sponsor representatives of any follow-up information on a previously reported SAE within one calendar day i.e., immediately but **no later than 24 hours** of when he or she becomes aware of it.

## Reporting of serious adverse events to Company

If the study is being conducted in multiple countries or multiple sites, Investigators or other site personnel inform Sponsor representatives of the SAE. The coordinating centre/Sponsor is responsible for informing Company of the SAE. All SAEs have to be reported to Company, whether or not considered causally related to the investigational product.

Send SAE report and accompanying cover page to Company (TCS)
Email: AEmailboxclinicaltrialTCS@astrazeneca.com

Serious adverse events that do not require expedited reporting to the Regulatory Authority/IRB/IEC still need to be reported to Company.

In the case of blinded trials, Company may request that the Sponsor either provide a copy of the randomization code/ code break information or unblind those SAEs which require expedited reporting.

## Overdose

If an overdose on a Company study drug occurs in the course of the study, then the Investigator or other site personnel inform the appropriate Sponsor representatives immediately, or **no later than 24 hours** of when he or she becomes aware of it.

The designated Sponsor representative works with theInvestigator to ensure that all relevant information is provided to the Sponsor data entry site.

For overdoses associated with a SAE, the standard reporting timelines apply, see Section 6.4. For other overdoses, reporting must occur within 30 days.

## Pregnancy

All pregnancies and outcomes of pregnancy should be reported to Sponsor and the Company.

### Maternal exposure

If a subject becomes pregnant during the course of the study, investigational product should be discontinued immediately.

Pregnancy itself is not regarded as an adverse event unless there is a suspicion that the investigational product under study may have interfered with the effectiveness of a contraceptive medication. Congenital abnormalities/birth defects and spontaneous miscarriages should be reported and handled as SAEs. Elective abortions without complications should not be handled as AEs. The outcome of all pregnancies (spontaneous miscarriage, elective termination, ectopic pregnancy, normal birth or congenital abnormality) should be followed up and documented even if the subject was discontinued from the study.

If any pregnancy occurs in the course of the study, then the Investigator or other site personnel informs the appropriate Sponsor/Sponsor representatives within 1 day i.e., immediately but **no later than 24 hours** of when he or she becomes aware of it.

The designated Sponsor representative works with the Investigator to ensure that all relevant information is provided to the Sponsor data entry site within 1 or 5 calendar days for SAEs (see Section 6.4) and within 30 days for all other pregnancies.

The same timelines apply when outcome information is available.

### Paternal exposure

Male subjects should refrain from fathering a child or donating sperm during the study and 3 months following the last dose.

Pregnancy of the subject’s partners is not considered to be an adverse event. However, the outcome of all pregnancies (spontaneous miscarriage, elective termination, ectopic pregnancy, normal birth or congenital abnormality), occurring from the date of the first dose until at least 12 weeks after the last dose of selumetinib or for longer if required, depending on the prescribing information of the combination or concomitantly administered medications, should, if possible, be followed up and documented.

Reproductive toxicology data indicate that selumetinib has the potential for adverse effects

on embryofetal development and survival. Therefore:

- Females of child-bearing potential must use acceptable, effective and reliable methods of contraception from the time of screening until at least 4 weeks after discontinuing study treatment or longer if required, depending on the prescribing information of the combination or concomitantly administered medications.

Selumetinib must not be administered to pregnant or breast-feeding women.

Conception while on treatment must be avoided.

- Male patients with sexual partners who are pregnant or who could become pregnant (i.e. women of child-bearing potential) must use acceptable, effective and reliable methods of contraception during the study and for at least 12 weeks after the last dose of selumetinib or for longer if required, depending on the prescribing information of the combination or concomitantly administered medications.
- Male and females of childbearing potential: reliable methods of contraception should be used consistently and correctly.
- Acceptable effective methods of contraception for women include implants, injectables, combined oral contraceptives, some intrauterine devices/systems and sterilisation including vasectomy of the partner, all being used in combination with barrier methods of contraception (e.g.condoms).
- Acceptable methods of contraception for men include the use of condoms with spermicidal foams/gels or prior vasectomy.
- True sexual abstinence is also an acceptable method of contraception (for both men and women).

## Management of IP related toxicities <<Dose Reductions>>

The subjects will be managed upon emergence of treatment related toxicities according to the “Guidance for Management of Specific Adverse Events in Studies of selumetinib (AZD6244; ARRY-142886, version 3.0)”.

### Recommendations for investigations of patients with a new or worsening dyspnea not considered due to disease under study


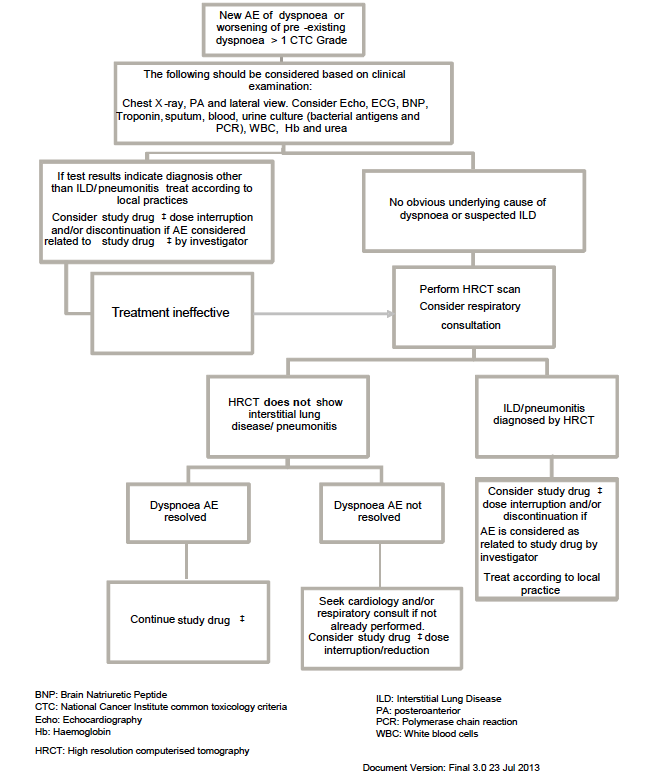


### Recommendations for diarrhea management

Diarrhea may occur during treatment with selumetinib and action should be taken as soon as symptoms develop. The recommendations for diarrhea management are based on guidelines from the American Society of Clinical Oncology (J Clin Oncol 2004; 22:2918-26). These guidelines recommend that treatment-induced diarrhea should be carefully monitored and treated aggressively to ensure that severe complications are avoided and that treatment is not delayed.

•Patients should be made aware that they are likely to experience diarrhea and be encouraged to record the number of stools and report possible associated symptoms

• Patients should be given loperamide (in accordance with local regulation and local practice) to take home with them and be advised to start immediately after the first episode of unformed stool.

• Patients should be given dietary advice in case of diarrhea (e.g. BRAT [bananas, rice, apple sauce, toast, plain pasta] diet; readily digestible food; avoidance of lactose-containing products, fried, fatty or spicy food) and increase fluid intake (8–10 glasses of clear fluids daily, including water and fluids containing salt and sugar, such as sports drinks and clear broth).

• Patients should seek advice early, from their physician or study nurse, if

− Persistent Grade 1 or 2 diarrhea or

− Grade 3 or 4 diarrhea

− Diarrhea becomes complicated by associated vomiting or inability to take oral fluids; marked abdominal distension or cramping; bloody stools, fever or symptoms of hypotension.

**CTCAE (version 4) grading for diarrhea**

| **CTCAE Grade** | **Patients without colostomies** | **Patients with colostomies** |
| --- | --- | --- |
| Grade 1 | Increase in number of loose stools per day (<4) | Mild increase in loose watery colostomy output compared with pre-treatment |
| Grade 2 | Increase in number of loose stools per day (4-6) or nocturnal episodes | Moderate increase in loose watery colostomy output compared with pre-treatment, not interfering with normal activity |
| Grade 3 | Increase of more than 7 loose stools per day or incontinence or needing support for dehydration | Severe increase in loose watery colostomy output compared with pre-treatment and interfering with normal activity |
| Grade 4 | Life-threatening consequences (e.g. hemodynamic collapse) |  |

**6.8.2.1 Initial management of uncomplicated Grade 1 or 2 diarrhea**

• Patients should **immediately** start loperamide after the first episode of diarrhea (4 mg initially) and continue loperamide (2 mg every 4 hours or after each unformed stool) until they have been free from diarrhea for at least 12 hrs

• If **after 12 hours of loperamide treatment** the diarrhea is not improving or resolved, the patient should be instructed to contact the center and to increase to high dose loperamide (2 mg every 2 hours, or 4 mg every 4 hours at night) and continue to take loperamide until they have been free from diarrhea for at least 12 hrs. Additional treatment may be considered according to local practice.

Note: should not exceed 16mg loperamide (i.e. 8 capsule/tablets) over a 24-hour period.

**• Pediatric patients:** Additional agents may be used concurrently if loperamide is not adequate to control diarrhea as a single agent. In addition, the following dietary advice should be considered: BRAT diet (bananas, rice, applesauce, toast, and plain pasta), readily digestible food, avoidance of lactose-containing products and fried, fatty or spicy foods, increased fluid intake (8-10 glasses of clear fluids/day (including water, clear broth, fluids containing salt and sugar). Patients should be encouraged to seek advice early from their physician or study nurse if they have persistent diarrhea, diarrhea complicated by vomiting, or inability to take oral liquids.

**6.8.2.2 Management of persistent (>24h) Grade 1 or 2 diarrhea despite loperamide at high dose**

The patient should be seen by the physician or study nurse for full evaluation and the following should be considered:

• Rehydration and electrolytes replacement as appropriate

• Infectious causes and etiologies such as Clostridium difficile or viral gastroenteritis;

• Antibiotics if appropriate (for example an oral fluoroquinolone for 7 days) particularly if the patient is neutropenic (<1 x 109/L) or has a fever;

• Discontinuation of loperamide and start of octreotide (Sandostatin);

It may also be appropriate to consider:

• Addition of other second-line anti-diarrheal agents according to local practice

• Selumetinib interruption until resolution of the diarrhea

• Hospitalization

In studies involving combination of selumetinib with other anti-cancer treatment, interruption or delay of the combination agent may be considered according to manufacturer’s guidance or local practice

**6.8.2.3 Management of any grade uncontrolled or complicated diarrhea, or Grade 3-4 diarrhea**

• Hospitalization and full evaluation

• Intravenous fluids, electrolytes and antibiotics if needed (e.g. fluoroquinolone)

• Interrupt selumetinib until diarrhea and associated symptoms resolve

• Start octreotide (Sandostatin)

• Interruption or delay of docetaxel according to manufacturer’s guidance or local practice.

**Guidance for the management of patients with diarrhea**


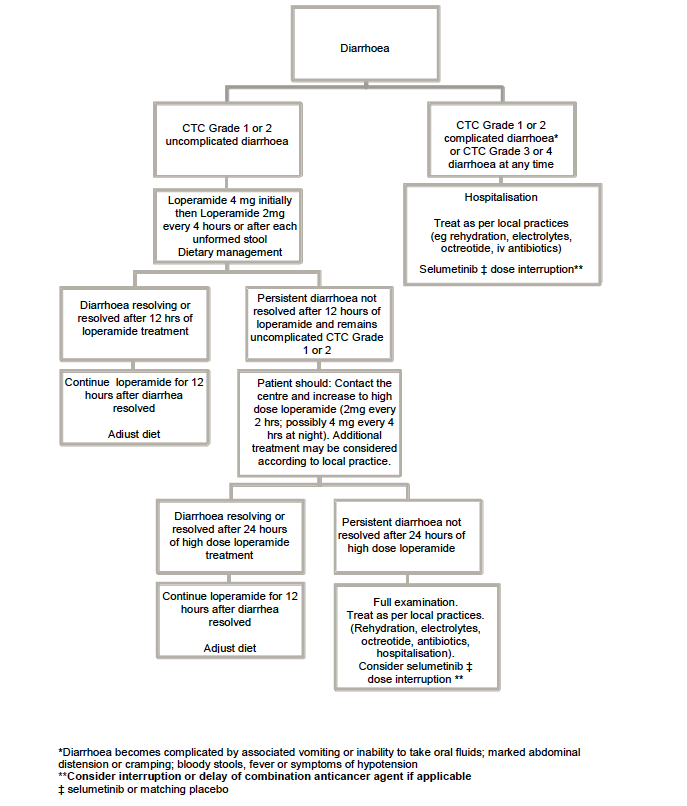


**6.8.3 Guidance for management of patients with a reduction in LVEF**


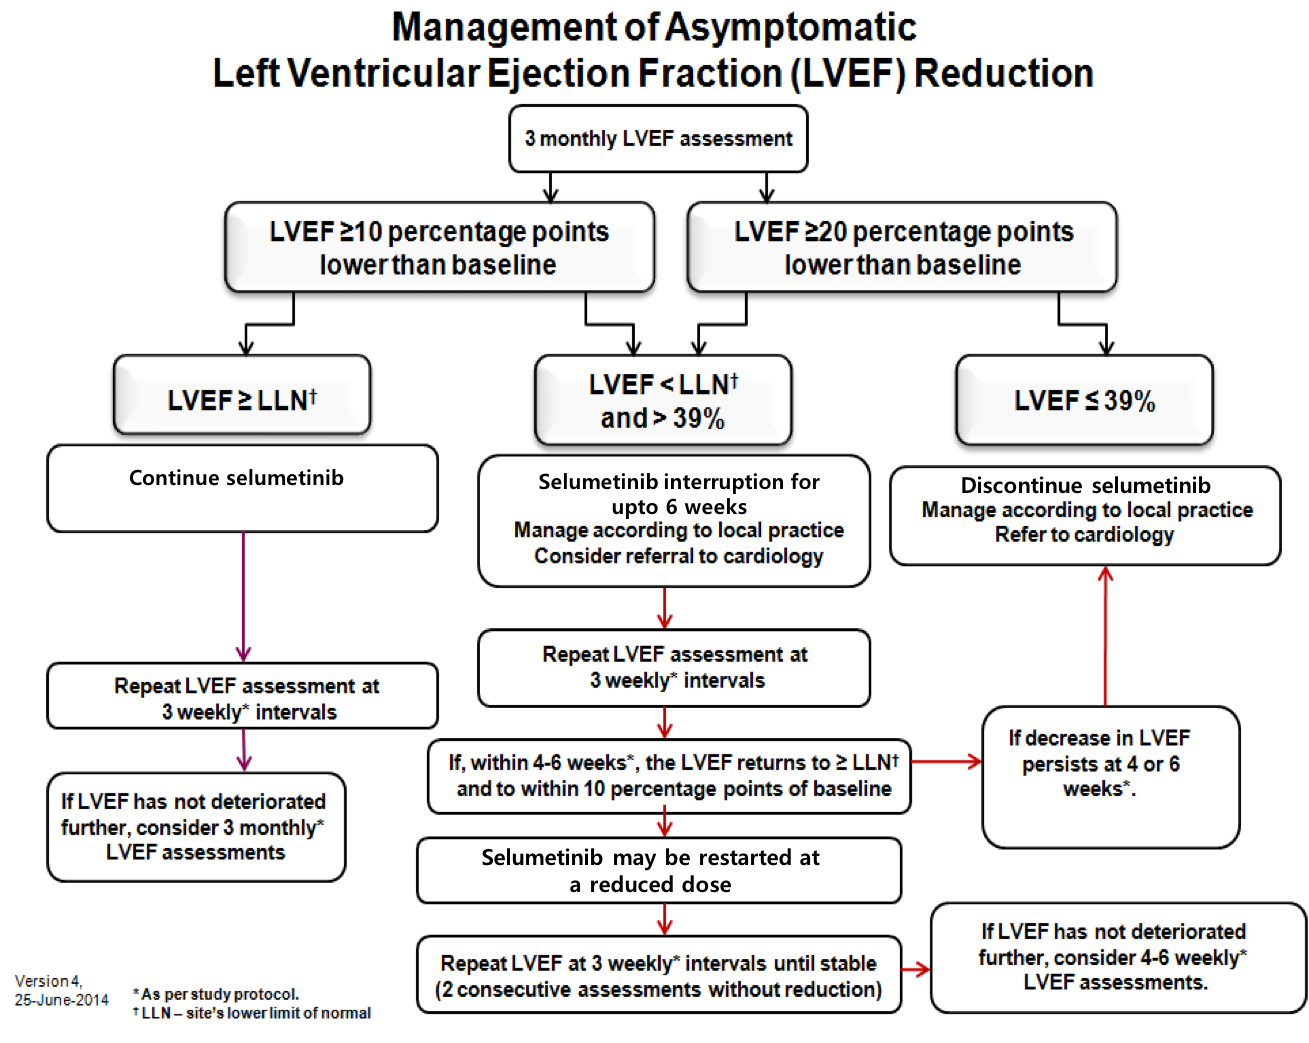


**6.8.4 Guidance for management of patients with visual symptoms or abnormal findings**


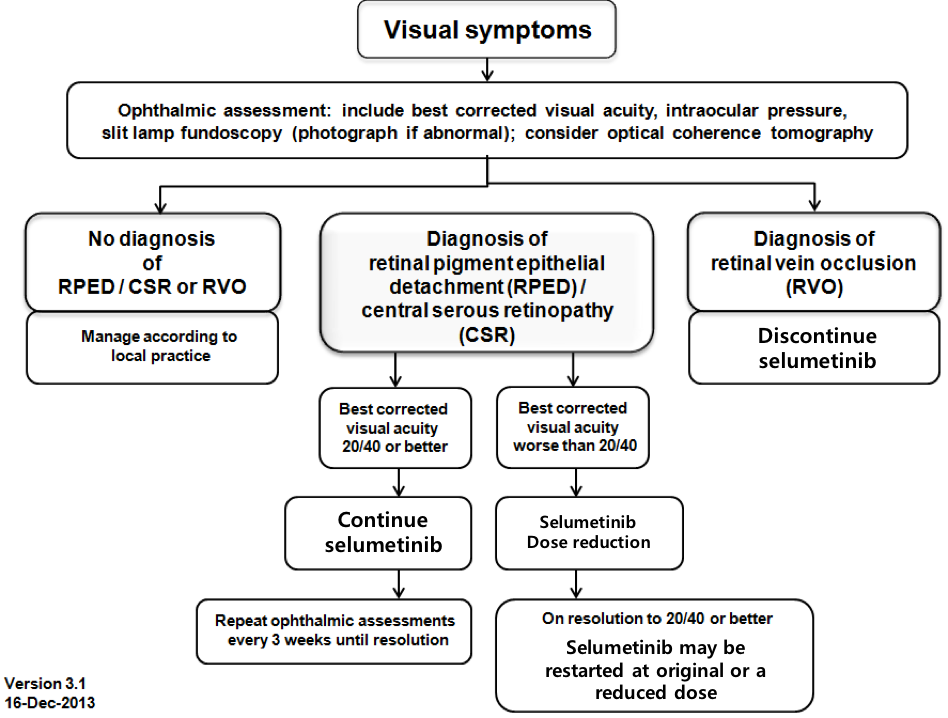


**6.8.5 Guidance for the management of patients with rash**


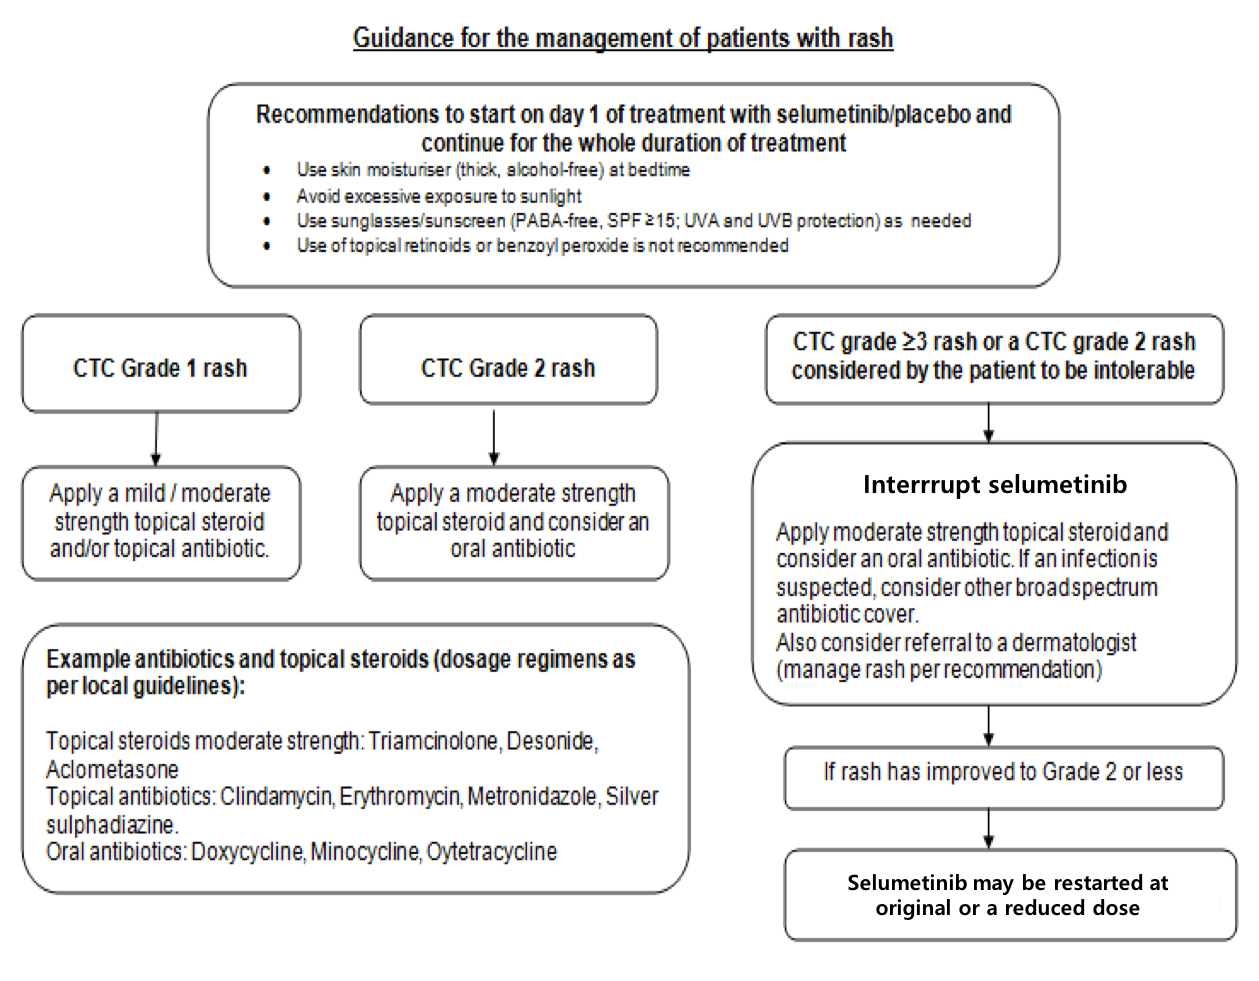


**Example topical steroids and antibiotics (use according to local guidelines)**


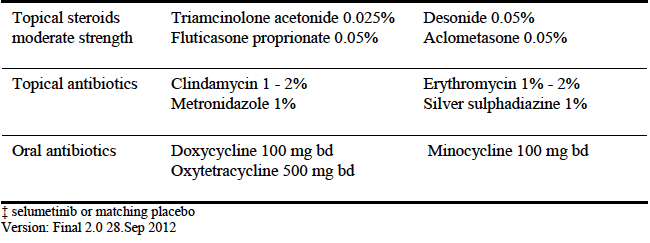


#### Paediatrics

Early initiation of treatment for rashes is strongly recommended to minimize the duration and severity of the adverse event. For pediatric subjects, the following guidelines are useful:

**Acneiform rash:**

Experience with acneiform rash in the pediatric studies to date suggests that topical clindamycin gel or lotion applied BID, rather than steroids, is the most helpful for pustular rash (typically seen in the older child/adolescent). In severe cases, semisynthetic oral tetracyclines such as doxycycline or minocyline may also be useful for older children and adolescents, but should be avoided in children younger than 8 years old because of risk to tooth development.

**Eczematous rash/xerosis:**

Eczematous/dry skin rash and other macular (non-acneiform) rash should be treated with a moisturizer such as Cerave or Eucerin. A low potency topical steroid may also be used if symptomatic. Ketoconazole shampoo should be used for any rash involving the scalp.

**Paronychia:**

For patients who do not undergo drainage, silver nitrate may be used, as well as topical bactroban, steroids, and/or antifungals. Silver nitrate is only of value when there is open inflamed skin or granulation tissue (e.g. pyogenic-granuloma-like lesions). If the periungual skin is swollen but intact (whether infectious or non-infectious), silver nitrate is not recommended. Patients should be cautioned to avoid trauma to the area. Podiatry consult may be considered for partial nail removal.

Patients who undergo incision and drainage and have no infectious organisms on culture receive treatment as above. If infection is identified, patients may be treated with systemic antibiotics (oral tetracyclines).

If paronychia recurs or develops in other fingers or toes, Flurandrenolide (e.g. Cordran) tape or topical steroid cream such as triamcinolone can be used in the morning and Bactroban and Nizoral topical ointments in the evening.

**6.8.6 Oral care recommendations for patients treated with selumetinib**

Patients should be encouraged to take responsibility for their own oral care wherever possible. This may require frequent encouragement and education. The general recommendations of Rubenstein EB et al (2004)) are to maintain a clean and pain-free mouth, which reduces patient discomfort and helps prevent infection and promote dietary intake. Evidence from the literature regarding implementation and efficacy of oral protocols and patient education, suggest that patients who are taught oral care protocols perform oral care more diligently, take more responsibility for their care and may show an improvement in oral symptoms.

Prevention, early diagnosis and management of stomatitis may reduce the need for dose interruption and / or reductions of the study medications due to severe stomatitis and so allow the patient to continue on the study drugs. It is strongly recommended that patients receive advice regarding daily oral health care regimes, both before and during treatment.

**6.8.6.1 Mouthwashes**

Patients with a healthy mouth may use non-alcoholic mouthwash several times (4 to 6 times daily, or according to the instructions) daily e.g. after each meal during the study.

Saline mouthwashes (Sodium chloride 0.9%) should be preferred in cases of stomatitis, and should be used at a different time to toothbrushing e.g. after tea.

Use of a mouthwash immediately after selumetinib intake is recommended.

The tongue can be gently brushed (if not sore) with a soft toothbrush.

Patients with, or at risk of stomatitis should not use commercial / over-the-counter mouthwashes because of the alcohol content and astringency. Chlorhexidine mouthwashes are not recommended for the treatment of established stomatitis.

The mouth should be regularly inspected by the patient and healthcare professionals.

**6.8.6.2 Smoking**

**Smoking** should be strongly discouraged; patients should be offered help with smoking cessation if necessary in the form of nicotine replacement therapy or referral to smoking cessation services.

**6.8.6.3 Alcohol intake**

A **high alcohol** intake should be discouraged and patients advised to avoid painful stimuli such as spicy foods, hot food and drink.

**6.8.6.4 Dental care**

Dentate patients:

• Patients who are free from dental problems may be at less risk of stomatitis.

• Teeth should be brushed twice daily with a fluoride toothpaste and soft toothbrush, in the morning before breakfast and last thing in the evening before bed, about 30 minutes after eating. Toothbrush should be replaced regularly at least every 3 months but patients with stomatitis should change their toothbrush every 4 - 6 weeks.

• Use of soft toothbrush is recommended.

• Dental floss should be used once daily (caution in patients with coagulopathies including a low platelet count).

Edentulous patients:

• Dentures should be left out whilst at rest.

• Dentures should be cleaned thoroughly twice daily (before and after soaking overnight) and after every meal using a soft toothbrush and denture cleaner water.

• Dentures should be soaked overnight in a mild denture-soaking solution.

**6.8.6.5 Sore mouth or stomatitis**

In the event of sore mouth or stomatitis:

• Consider treating stomatitis at an early stage (CTCAE grade 1) or as soon as the patient complains of a sore mouth.

• Consider using oral topical analgesic anaesthesia with or without topical steroids, antiviral and/or antifungal medications depending on the patient’s clinical condition and the local standard medical practice.

**6.8.7 Management of events of serum creatine kinase increased (raised creatine phosphokinase) and possible muscle symptoms**

Abnormal laboratory values of serum creatine kinase (CK) / CPK elevation have been reported in patients receiving treatment with some MEK inhibitors. The CK enzyme is released from a number of tissue types, including skin and muscle. However, for patients receiving treatment with MEK inhibitors, the exact source of this enzyme is unknown. In order to minimize possible consequences associated with CK elevation that may potentially be arising from a muscular source, AZ recommends the management guidelines as described below. Additionally, laboratory values of ‘CK increased’ should only be reported as AEs if they fulfil any of the criteria for a serious AE, or if they are the reason for discontinuation of treatment with selumetinib.

Muscular symptoms concurrent with CK elevation should be reported as AEs. If appropriate, the definitions described in Table below should be applied:

**Muscle symptoms with possible creatine kinase increased**


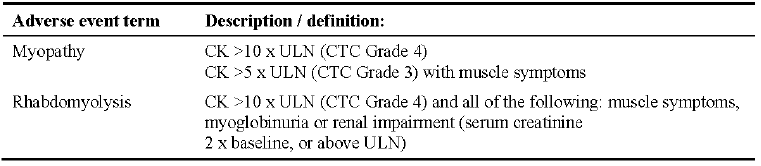


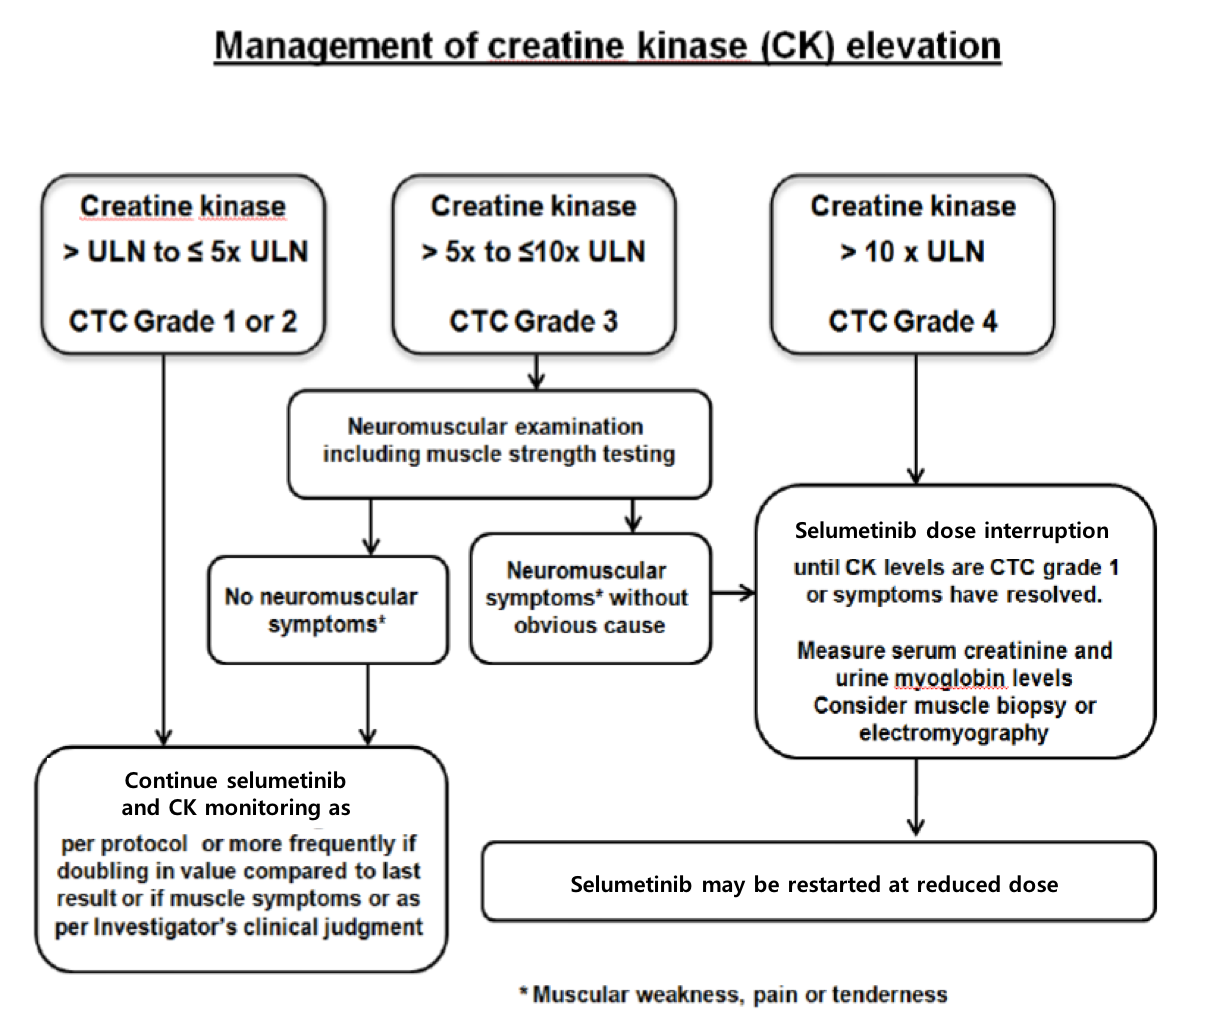


# investigational product and other Treatments

## Identity of investigational product(s)

| Investigational product | Dosage form and strength | Manufacturer |
| --- | --- | --- |
| Selumetinib® (AZD6244; ARRY-142886) | - Patients with age ≥ 3 years and ≤18 years: 20-25 mg/m2/dose q 12 hrs - Patients with age > 18 years: 50 mg/dose q 12 hrs - 28 days /cycle x 26 cycles (2 years) | AstraZeneca |
|  |  |  |

## Dose and treatment regimens

Selumetinib will be supplied in 10 mg (white) and 25 mg (blue) capsules. Selumetinib will be administered orally twice daily (approximately every 12 hours) continuously for 28 day cycles with no rest periods between cycles. Patients should be instructed to take the dose of selumetinib on an empty stomach (no food or drink other than water for 2 hours before and 1 hour after dosing) with water only. Dosing will be performed based on body surface area (BSA), and doses will be rounded the nearest 10 mg using a dosing nomogram. The capsules cannot be crushed and must be swallowed in whole.

Dosing nomogram for selumetinib (20 mg/m2 q 12 hrs) for patients with 3-18 years of age and with NF1 and PN.

| BSA | 0.55-0.89 | 0.9-1.09 | 1.1-1.39 | 1.4-1.59 | 1.6-1.79 | 1.8-1.99 | 2.0-2.29 | ≥2.3 |
| --- | --- | --- | --- | --- | --- | --- | --- | --- |
| Dose (20 mg/m2 q 12 hrs) | 10 | 20 | 25 | 30 | 35 | 40 | 45 | 50 |

Dosing nomogram for selumetinib (25 mg/m2 q 12 hrs) for patients with 3-18 years of age and with NF1 and PN.

| BSA | 0.55-0.59 | 0.6-0.89 | 0.9-1.09 | 1.1-1.29 | 1.3-1.49 | 1.5-1.69 | 1.7-1.89 | ≥1.9 |
| --- | --- | --- | --- | --- | --- | --- | --- | --- |
| Dose (25 mg/m2 q 12 hrs) | 10 | 20 | 25 | 30 | 35 | 40 | 45 | 50 |

Specific restrictions

1. Selumetinib capsules should be swallowed intact (not chewed or altered in any way) with a glassful of water twice a day, approximately 12 hours apart, on an empty stomach. No food or drink other than water for 2 hours prior to dosing and 1 hour after dosing (i.e., selumetinib should be taken at least 2 hours after a meal and 1 hour before the next meal).
2. Patients should avoid excessive exposure to sunlight. Patients should use adequate sunscreen protection if exposure to sunlight is to be anticipated.
3. During the studies, patients should avoid consuming large amounts of grapefruits, Seville oranges, or any other products that may contain these fruits, e.g., grapefruit juice, as these may affect selumetinib metabolism. These products inhibit CYP3A4 metabolism of which selumetinib is a substrate, so it would be expected to increase plasma concentrations if taken concurrently
4. Patients should avoid donating blood whilst participating in studies of selumetinib and for at least 12 weeks after receiving the last dose of the study medications or for longer if required in accordance with the prescribing information for the comparator / concomitant / compulsory administered medications.
5. Unless considered clinically indicated, patients should avoid taking other additional non-study medications that may interfere with the study medications. In particular, patients should avoid medications that are known to either induce or inhibit the activity of hepatic microsomal isoenzymes CYP1A2, CYP2C19 and CYP3A4, as this may interfere with the metabolism of selumetinib. (See Appendix G).

## Labelling

Labels will be prepared in accordance with Good Manufacturing Practice (GMP) and local regulatory guidelines. The labels will fulfil GMP Annex 13 requirements for labelling. Label text will be translated into local language.

- The label will include the following information: Name of Sponsor
- Investigational product/study drug dosage form, route of administration, and quantity of dosage units
- Storage conditions
- Study code
- Enrolment code
- Directions for use
- The name of the Principal Investigator
- The period of use e.g., expiry date.
- The following standard statements
- ‘for clinical study use only’
- ‘keep out of reach of children’

## Storage

All study drugs should be kept in a secure place under appropriate storage conditions. A description of the appropriate storage condition is specified on the label of the product(s).

Storage of selumetinib 10mg capsules must be stored at room temperature (specifically below 30Co – although the US pack says 20 to 25Co). The temperature of shipments must also be monitored to ensure the temperature is within the required limits (below 30Co). Data is available to support the 10mg capsule being stored at 30Co or less and that performance could be reduced if stored at temperatures higher than 30Co.

25mg capsules are stored at room temperature; however, temperature monitoring is not necessary for 25mg capsules.

## Compliance

The administration of all study drugs (including investigational products) should be recorded in the appropriate sections of the Case Report Form.

The patient’s research team will conduct pill counts with every scheduled visit. Caregivers and patients will be instructed to return all empty, partially full, and full bottles to their research team at each visit.

## Accountability

The study drug provided for this study will be used only as directed in the study protocol.

The study personnel will account for all study drugs dispensed to and returned from the subject.

**PATIENT DAILY MEDICATION DIARY FOR SELUMETINIB**

Each dose of selumetinib should be taken on an empty stomach (no food or drink other than water for 2 hours before and 1 hour after dosing). Take with water only. Store capsules in temperature below 25°C. Keep away from heat sources.


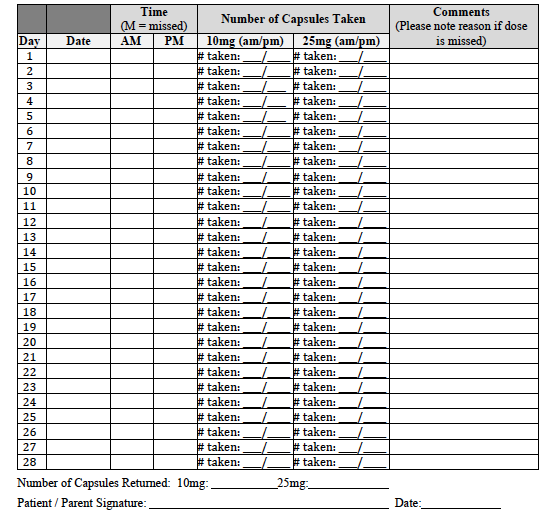


## Concomitant and other treatments

1. Other cancer chemotherapy, radiation, immunotherapy, biologic therapy, hematopoietic growth factors, or investigational agents cannot be administered to patient while receiving selumetinib.
2. Doses of vitamin E greater than the 100% daily recommended doses are contraindicated.
3. The use of corticosteroids for control of symptoms related to the underlying NF1 or for other reasons will be allowed.
4. Throughout the study, patients should be instructed to avoid changes to, or the addition of concomitant medications, in particular any that may affect the metabolism of selumetinib, unless considered clinically indicated.

### Other concomitant treatment

Other medication other than that described above, which is considered necessary for the subject’s safety and well-being, may be given at the discretion of the Investigator and recorded in the appropriate sections of the Case Report Form.

# statistical analyses

## Description of analysis sets

### Safety analysis set

 Safety will be assessed in all patients who received at least one dose of study drugs.

### Efficacy analysis set

Efficacy will be assessed in all participants.

## Sample size estimate

25 mg per square meter of AZD6244 (Selumetinib; AstraZeneca, Cambridge, England) with a median 30 cycles (28-day cycle) resulted in tumor volume decreases from baseline of ≥20% in 71% pediatric patients (17). Asian ethnic group is suggested to have higher exposure of selumetinib than non-Asian group. However, only one study was reported about pharmacokinetics of selumetinib in Asian healthy adult subjects. In this study, dose-normalized AUC and Cmax were 35% and 39% (95%) higher in the pooled Asian group, respectively, compared with those in Western subjects.

Therefore, in the initial stage, a total of 10 evaluable pediatric (group 1) and 10 adult Korean patients (group 2) are to be entered. The 10 pediatric patients will be treated with a reduced dosage of 20 mg/m2/dose q 12 hrs and the 10 adult patients with 50 mg/dose q 12 hrs. If there is no serious adverse reaction in 6 out of 10 patients for the first six cycles, another 10 pediatric patients (group 3) will be treated with 25 mg/m2/dose q 12 hrs. If we see a serious adverse reaction in 4 out of 10 patients in group 3, the dose will be reduced from 25 to 20 mg/m2/dose q 12 hrs in group 3.

## Definitions of analysis sets, outcome measures and methods of statistical analysis

### Safety analysis

- CTCAE term (AE description) and grade: The descriptions and grading scales found in the revised NCI Common Terminology Criteria for Adverse Events (CTCAE) version 4.0 will be utilized for AE reporting. All appropriate treatment areas should have access to a copy of the CTCAE version 4.0. A copy of the CTCAE version 4.0 can be downloaded from the CTEP web site. http://ctep.cancer.gov/protocolDevelopment/electronic_applications/ctc.htm.
- PK parameters (CL/F and V/F) and exposure parameters (Cmax and AUC) will be described. The correlation with any adverse events and PK parameters will be assessed.

### Efficacy analysis

- PN volume will be measured by 3D MRI volumetric analysis. The range and mean value of decreased volume with standard deviation will be presented in group 1, 2 and 3. Objective response rate (defined as PN decrease ≥20% compared to baseline) will be presented in group 1, 2 and 3 as the number of patients with response over the total number of patients in each group.
- For resting state fMRI will be done. Functional connectivity (FC) changes from baseline will be measured. The correlation coefficients will be calculated between the selected regions which indicate the strength of FC among the two regions, producing a matrix for each subject. The regions associated with visuospatial network and default mode network will be selected.
- Neuropsychiatric test: Korean Wechsler Preschool and Primary Scale of Intelligence (K-WPPSI) will be done for patients < age 6 years, Korean Wechsler intelligence scale for children-fourth edition (K-WISC-IV) will be done for patients with age 6-15 years and Korean Wechsler adult intelligence scale-fourth edition (K-WAIS-IV) will be done for patients ≥ age 16 years. Verbal comprehension index (VCI), perceptual reasoning index (PCI), working memory index (WMI), processing speed index (PSI) an full scale IQ (FSIQ) will be measured. Advanced test of attention (ATA) will be done for patients with age 5-18 years. Seoul Computerized Neurocognitive Function Test (SCNT) will be done for patients ≥ age 19 years. The changes of score in each item will be summarized from baseline across the study period.
- Quality of Life and pain will be assessed with patient-reported outcomes (PROs). Changes in each subscale of PROs after treatment will be assessed. PedsQL 4.0 Generic Core Scales are multidimensional child self-report and parent proxy-report scales to assess health-related quality of life (QOL) in children, adolescents, and young adults aged 2 – 25 years. INF1-QOL for patients >18 years old. Korean Neuropathic Pain Questionnaire (KNPQ) for adults >18 years of age and Numeric Pain Rating Scale (NPS)/Wong-Baker Faces Pain Rating Scale (WBS) for patients with 18 years of age will used for pain assessment.
- Kinome analysis and gene expression profiles will be compared before treatment and after treatment and compared between patients with good response (over 20% volume decrease of PN) and patients with poor response (less than 20% volume decrease of PN).
- The types of mutations and their locations along the functional domain of the *NF1* gene will be analysed with the response (good or poor) of PN in the patients (chi-square test).
- With information obtained from patient diaries, adherence will be calculated as follows: [(scheduled doses – missed doses) / scheduled doses X 100. For pill counts, the number of pills returned to clinic will be subtracted from the number of pills dispensed at the previous visit. That number will be divided by the number of pills the patient should have taken according to their prescribed dosing schedule, and then multiplied by 100 to obtain the adherence percentage.

# Study and data MANAGEMENT

## Training of study site personnel

Before the first subject is entered into the study, a Sponsor representative will review and discuss the requirements of the Clinical Study Protocol and related documents with the investigational staff and also train them in any study specific procedures.

The Principal Investigator will ensure that appropriate training relevant to the study is given to all of these staff, and that any new information relevant to the performance of this study is forwarded to the staff involved.

The Principal Investigator will maintain a record of all individuals involved in the study (medical, nursing and other staff).

## Monitoring of the study

During the study, a Sponsor representative will have regular contacts with the study site, including visits to:

- Provide information and support to the Investigator(s)
- Confirm that facilities remain acceptable
- Confirm that the investigational team is adhering to the protocol, that data are being accurately and timely recorded in the CRFs, that biological samples are handled in accordance with the Laboratory Manual and that study drug accountability checks are being performed
- Perform source data verification (a comparison of the data in the CRFs with the subject’s medical records at the hospital or practice, and other records relevant to the study) including verification of informed consent of participating subjects. This will require direct access to all original records for each subject (e.g., clinic charts)
- Ensure withdrawal of informed consent to the use of the subject’s biological samples is reported and biological samples are identified and disposed of/destroyed accordingly, and the action is documented, and reported to the subject.

The Sponsor representative will be available between visits if the Investigator(s) or other staff at the centre needs information and advice about the study conduct.

### Source data

Refer to the Research Agreement for location of source data.

### Research Agreement(s)

The Principal Investigator should comply with all the terms, conditions, and obligations of the Research Agreement, or equivalent, for this study. In the event of any inconsistency between this Clinical Study Protocol and the Research Agreement, the terms of Clinical Study Protocol shall prevail with respect to the conduct of the study and the treatment of subjects and in all other respects, not relating to study conduct or treatment of subjects, the terms of the Research Agreement shall prevail.

Agreements between Sponsor and the Principal Investigator should be in place before any study-related procedures can take place, or subjects are enrolled.

### Archiving of study documents

The Investigator follows the principles outlined in the Research Agreement (RA).

## Study timetable and end of study

The end of the study is defined as ‘the last visit of the last subject undergoing the study’.

The study is expected to start in the first quarter of 2018 and to end by the first quarter of 2021.

The study may be terminated at individual centres if the study procedures are not being performed according to GCP, or if recruitment is slow. Sponsor may also terminate the entire study prematurely if concerns for safety arise within this study or in any other study with selumetinib.

## Data management

Data management will be performed by principal investigator according to the Data Management Plan*.* Adverse events and medical/surgical history will be classified according to the terminology of the latest version the Medical Dictionary for Regulatory Activities (MedDRA).

When the completed paper Case Report Forms have been scanned and indexed, the data are entered into the study database and proofread.

The data collected through third party sources will be obtained and reconciled against study data.

Adverse events and medical/surgical history will be classified according to the terminology of the latest version the Medical Dictionary for Regulatory Activities (MedDRA).

Data queries will be raised for inconsistent, impossible or missing data. All entries to the study database will be available in an audit trail.

The data will be validated as defined in the Data Management Plan. Quality control procedures will be applied to each stage of data handling to ensure that all data are reliable and have been processed correctly. The Data Management Plan will also clarify the roles and responsibilities of the various functions and personnel involved in the data management process

When all data have been coded, validated, and locked, clean file will be declared. Any treatment revealing data may thereafter be added and the final database will be locked.

# Ethical and regulatory requirements

## Ethical conduct of the study

The study will be performed in accordance with ethical principles that have their origin in the Declaration of Helsinki and are consistent with ICH/Good Clinical Practice, applicable regulatory requirements and the Sponsor policy on Bioethics and Human Biological Samples.

## Subject data protection

The Informed Consent Form will incorporate (or, in some cases, be accompanied by a separate document incorporating) wording that complies with relevant data protection and privacy legislation.

## Ethics and regulatory review

An Ethics Committee should approve the final study protocol, including the final version of the Informed Consent Form and any other written information and/or materials to be provided to the subjects. The Investigator will ensure the distribution of these documents to the applicable Ethics Committee, and to the study site staff.

The opinion of the Ethics Committee should be given in writing. The Investigator should submit the written approval to Sponsor before enrolment of any subject into the study.

The Ethics Committee should approve all advertising used to recruit subjects for the study.

Any modifications to the Informed Consent Form that are needed to meet local requirements.

If required by local regulations, the protocol should be re-approved by the Ethics Committee annually.

Before enrolment of any subject into the study, the final study protocol, including the final version of the Informed Consent Form, is approved by the national regulatory authority or a notification to the national regulatory authority is done, according to local regulations.

Each Principal Investigator is responsible for providing the Ethics Committees/IRB with reports of any serious and unexpected adverse drug reactions from any other study conducted with the investigational product. Company will provide this information to the Principal Investigator so that he/she can meet these reporting requirements.

## Informed consent

The Principal Investigator(s) at each centrewill:

- Ensure each subject is given full and adequate oral and written information about the nature, purpose, possible risk and benefit of the study
- Ensure each subject is notified that they are free to discontinue from the study at any time
- Ensure that each subject is given the opportunity to ask questions and allowed time to consider the information provided
- Ensure each subject provides signed and dated informed consent before conducting any procedure specifically for the study
- Ensure the original, signed Informed Consent Form(s) is/are stored in the Investigator’s Study File
- Ensure a copy of the signed Informed Consent Form is given to the subject
- Ensure that any incentives for subjects who participate in the study as well as any provisions for subjects harmed as a consequence of study participation are described in the informed consent form that is approved by an Ethics Committee.

## Changes to the protocol and informed consent form

Study procedures will not be changed without the mutual agreement of the Principal Investigator and Sponsor.

If there are any substantial changes to the study protocol, then these changes will be documented in a study protocol amendment and where required in a new version of the study protocol (Revised Clinical Study Protocol).

The amendment is to be approved by the relevant Ethics Committee and if applicable, also the national regulatory authority approval, before implementation. Local requirements are to be followed for revised protocols.

Sponsor will distribute any subsequent amendments and new versions of the protocol to each Principal Investigator(s). For distribution to Ethics Committee see Section 10.3.

If a protocol amendment requires a change to a centre’s Informed Consent Form, Sponsor and the centre’s Ethics Committee are to approve the revised Informed Consent Form before the revised form is used.

If local regulations require, any administrative change will be communicated to or approved by each Ethics Committee.

## Audits and inspections

Authorised representatives of Sponsor, a regulatory authority, or an Ethics Committee may perform audits or inspections at the centre, including source data verification. The purpose of an audit or inspection is to systematically and independently examine all study-related activities and documents, to determine whether these activities were conducted, and data were recorded, analysed, and accurately reported according to the protocol, Good Clinical Practice (GCP), guidelines of the International Conference on Harmonisation (ICH), and any applicable regulatory requirements. The Investigator will contact Sponsor immediately if contacted by a regulatory agency about an inspection at the centre.

# LIST OF References

1. Varni JW, Seid M, Kurtin PS. PedsQL 4.0: reliability and validity of the Pediatric Quality of Life Inventory version 4.0 generic core scales in healthy and patient populations. Med Care. 2001;39(8):800-12.

2. Ferner RE, Thomas M, Mercer G, Williams V, Leschziner GD, Afridi SK, et al. Evaluation of quality of life in adults with neurofibromatosis 1 (NF1) using the Impact of NF1 on Quality Of Life (INF1-QOL) questionnaire. Health Qual Life Outcomes. 2017;15(1):34.

3. Evans DG, Howard E, Giblin C, Clancy T, Spencer H, Huson SM, et al. Birth incidence and prevalence of tumor-prone syndromes: estimates from a UK family genetic register service. American journal of medical genetics Part A. 2010;152a(2):327-32.

4. Korf BR. Plexiform neurofibromas. American journal of medical genetics. 1999;89(1):31-7.

5. Needle MN, Cnaan A, Dattilo J, Chatten J, Phillips PC, Shochat S, et al. Prognostic signs in the surgical management of plexiform neurofibroma: the Children's Hospital of Philadelphia experience, 1974-1994. The Journal of pediatrics. 1997;131(5):678-82.

6. Dombi E, Solomon J, Gillespie AJ, Fox E, Balis FM, Patronas N, et al. NF1 plexiform neurofibroma growth rate by volumetric MRI: relationship to age and body weight. Neurology. 2007;68(9):643-7.

7. Kluwe L, Friedrich RE, Mautner VF. Allelic loss of the NF1 gene in NF1-associated plexiform neurofibromas. Cancer genetics and cytogenetics. 1999;113(1):65-9.

8. Lehtonen A, Howie E, Trump D, Huson SM. Behaviour in children with neurofibromatosis type 1: cognition, executive function, attention, emotion, and social competence. Dev Med Child Neurol. 2013;55(2):111-25.

9. Descheemaeker MJ, Plasschaert E, Frijns JP, Legius E. Neuropsychological profile in adults with neurofibromatosis type 1 compared to a control group. J Intellect Disabil Res. 2013;57(9):874-86.

10. Xu GF, O'Connell P, Viskochil D, Cawthon R, Robertson M, Culver M, et al. The neurofibromatosis type 1 gene encodes a protein related to GAP. Cell. 1990;62(3):599-608.

11. Serra E, Rosenbaum T, Winner U, Aledo R, Ars E, Estivill X, et al. Schwann cells harbor the somatic NF1 mutation in neurofibromas: evidence of two different Schwann cell subpopulations. Human molecular genetics. 2000;9(20):3055-64.

12. Packer RJ, Gutmann DH, Rubenstein A, Viskochil D, Zimmerman RA, Vezina G, et al. Plexiform neurofibromas in NF1: toward biologic-based therapy. Neurology. 2002;58(10):1461-70.

13. Widemann BC, Babovic-Vuksanovic D, Dombi E, Wolters PL, Goldman S, Martin S, et al. Phase II trial of pirfenidone in children and young adults with neurofibromatosis type 1 and progressive plexiform neurofibromas. Pediatric blood & cancer. 2014;61(9):1598-602.

14. Weiss B, Widemann BC, Wolters P, Dombi E, Vinks AA, Cantor A, et al. Sirolimus for non-progressive NF1-associated plexiform neurofibromas: an NF clinical trials consortium phase II study. Pediatric blood & cancer. 2014;61(6):982-6.

15. Jakacki RI, Dombi E, Steinberg SM, Goldman S, Kieran MW, Ullrich NJ, et al. Phase II trial of pegylated interferon alfa-2b in young patients with neurofibromatosis type 1 and unresectable plexiform neurofibromas. Neuro-oncology. 2017;19(2):289-97.

16. Robertson KA, Nalepa G, Yang FC, Bowers DC, Ho CY, Hutchins GD, et al. Imatinib mesylate for plexiform neurofibromas in patients with neurofibromatosis type 1: a phase 2 trial. The Lancet Oncology. 2012;13(12):1218-24.

17. Dombi E, Baldwin A, Marcus LJ, Fisher MJ, Weiss B, Kim A, et al. Activity of Selumetinib in Neurofibromatosis Type 1-Related Plexiform Neurofibromas. The New England journal of medicine. 2016;375(26):2550-60.

18. Dymond AW, Elks C, Martin P, Carlile DJ, Mariani G, Lovick S, et al. Pharmacokinetics and pharmacogenetics of the MEK1/2 inhibitor, selumetinib, in Asian and Western healthy subjects: a pooled analysis. European journal of clinical pharmacology. 2017;73(6):717-26.

Appendix A. Pharmacokinetic Worksheet

Subject No: _____________________________

BSA (m2):___________________ Dose level (mg/m2):___________________

MR Sequence: ___________________________

Actual Dose: ___________________ Time dose taken: ___________________

| Sample # | Day | Date | Hour | Target time | Time obtained |
| --- | --- | --- | --- | --- | --- |
| 1 | 1 |  | Pre dose |  |  |
| 2 | 1 |  | 0.5 hr post dose #1 |  |  |
| 3 | 1 |  | 1 |  |  |
| 4 | 1 |  | 2 |  |  |
| 5 | 1 |  | 3 |  |  |
| 6 | 1 |  | 5 |  |  |
| 7 | 1 |  | 8 |  |  |
| 8 | 1 |  | 10-12 |  |  |
| 9 | 2 |  | 24 |  |  |
| 10 | 2 |  | 30-36 hr post dose 1 |  |  |
| 11 | 27-28** |  | Pre dose 1 day 27-28* |  |  |

**Date:** ___________________

*Obtain sample within +/- 3days of day 27-28.

**Obtain this sample at the time of evaluation for cycle #2 on the same day the peripheral blood

Is obtained for biologic studies

Blood samples: 3 ml of whole blood will be collected in a heparinized tube (Green Top).

Plasma: should be separated by centrifugation (10 min at 1000 g or 2500 rpm) within four hours

After collection. Separated plasma will be capped by means of polyethylene stoppers and labeled

With the registration number, subject ID number, date and time of sampling, and sample number.

Plasma samples should be stored in the dark at -70° C.

Appendix B. Whole body MR volumetry protocol

**Whole-body MR images protocol**

|  | **STIR** |
| --- | --- |
| Plane | coronal |
| Echo Train Length | 50 |
| TR | 5000 - 6000 |
| TE | 60 |
| TI | 160 |
| Slice Thickness | 5 mm |
| Skip | 0 |
| Matrix | 256x256 |
| FOV | 45 - 50 cm |
| NEX | 2 |

3-T MR imager (Ingenia, Philips Medical Systems) with an integrated body coil was used to acquire whole-body MR images in each patient. Each patient was examined from head to toe in the supine position. Uncooperative patients were sedated during examination according to our institutional protocol. Our institutional protocol for whole-body MR images for patients with neurofibromatosis type I includes entire body imaging by using a coronal and sagittal short tau inversion recovery (STIR) image, and brain imaging by using axial T1-, and T2- weighted image, Fluid-attenuated inversion recovery (FLAIR) image, and fat-saturated coronal T2 weighed image. For the volumetric analysis of the plexiform neurofibromas, coronal STIR images of entire body were used. The total imaging acquisition time for the coronal STIR image was approximately 15 to 30 minutes according to patient’s height. Intravenous contrast material was not administered. Table 1 shows imaging parameters of coronal STIR sequence for the volumetric analysis of plexiform neurofibromas in detail.

Table 1. Parameters of coronal STIR MR imaging for volumetric analysis of plexiform neurofibromas.

**MRI volumetric**

Digital Imaging and Communications in Medicine (dicom) data of the MR images were loaded to the in-house developed software ‘AsanJ’, based on plug-in package for ImageJ (Bethesda, Maryland; <http://rsbweb.nih.gov/ij/>), for lesion segmentation and volumetric. The regions of interest (ROIs) for analysis were drawn by two experienced image analysts (J.P., 7 years’ experience; J.H.G., 5 years’ experience) independently. An amplitude segmentation technique based on histogram features was used to automatically place the ROIs. [1, 2]

Where is the resulting pixel at co-ordinate, is the pixel of input image and is the value of threshold.

To minimize human measurement error, we used automatic volumetric algorithm. When the image analyst placed an initial ROI contoured around the target plexiform tumor, the software automatically calculated the threshold (), and delineated the plexiform tumor to quantified its volume. After completing MRI volumetry of all cases, the MRI volumetric results of two image analysts were validated by a pediatric radiologist (H.M.Y, 7 years’ experience). If there is a significantly biased case, the pediatric radiologist will measure it again. Finally, the representative volumetric values were determined by averaging the two volumetric results.

References

1. Ramesh N, Yoo JH, Sethi IK. Thresholding based on histogram approximation. IEEE Proc Vision Image Signal Proc. 1995;142:271–9.
2. Raju P.D.R., Neelima G.: Image Segmentation by using histogram thresholding. Int. J. Comput. Sci. Eng. Technol. 2(1), 776–779 (2012).

Volumetry Analysis Form

Subject No: _____________________________

MRI date (dd-mm-yyyy): ___________________

MR Sequence: ___________________________

**1. Target Lesions: Volume (Cm3)**

| **No** | **Location** | **Series No.** (ex: SE 5) | **Image No. range**  (ex: IM 10-20) | **Volume (Cm3)** |
| --- | --- | --- | --- | --- |
| **#1** |  |  | **-** |  |
| **#2** |  |  | **-** |  |
| **#3** |  |  | **-** |  |
| **#4** |  |  |  |  |
| **#5** |  |  |  |  |

**2. Comments: ____________________________________**

**______________________________________________**

Image analyst: ________________ __________________

(name) (signature)

Date (dd-mm-yyyy): ________________________________

Appendix C. Peripheral Blood Mononuclear Cell Samples (PBMCs) and Plasma

Subject No: _____________________________

BSA (m2):___________________ Dose level (mg/m2):___________________

MR Sequence: ___________________________

Actual Dose: ___________________ Time dose taken: ___________________

These samples will be obtained at Baseline, Visit 11 and 18/

| Baseline sample: date (dd/mm/yyyy) |  |
| --- | --- |
| Visit 11sample: date (dd/mm/yyyy)/ day of cycle |  |
| Visit 18 sample: date (dd/mm/yyyy)/ day of cycle |  |

Collection of Peripheral Blood:

Collect 5 mL peripheral blood in EDTA.

**Appendix D: Performance Status Scales/Scores**


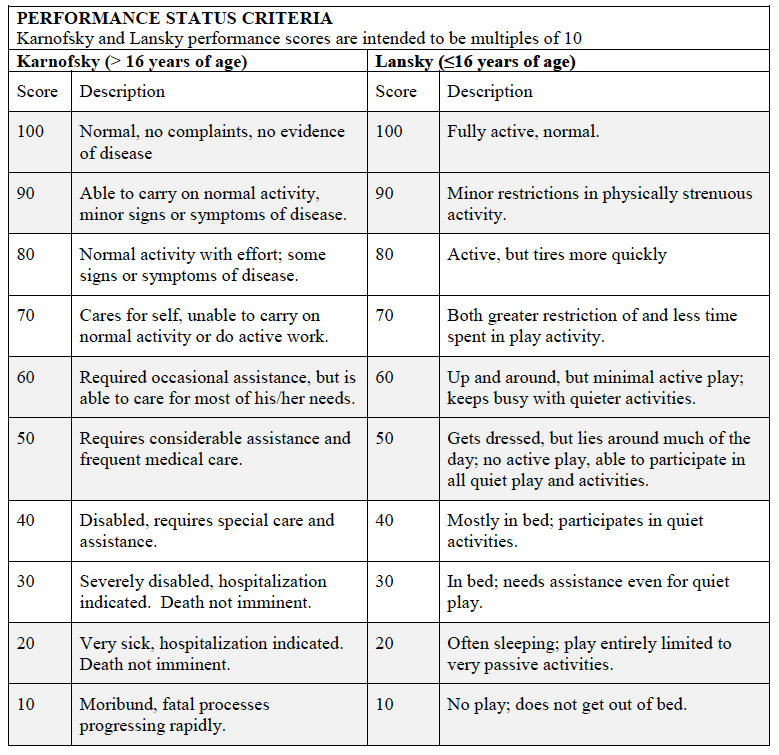


Appendix E Actions Required in Cases of Increases in Liver Biochemistry and Evaluation of Hy’s Law

Introduction

This Appendix describes the process to be followed in order to identify and appropriately report cases of Hy’s Law. It is not intended to be a comprehensive guide to the management of elevated liver biochemistries. Specific guidance on the managing liver abnormalities can be found in Section XX of the protocol.

During the course of the study the Investigator will remain vigilant for increases in liver biochemistry. The Investigator is responsible for determining whether a patient meets potential Hy’s Law (PHL) criteria at any point during the study.

The Investigator participates, together with Sponsor clinical project representatives, in review and assessment of cases meeting PHL criteria to agree whether Hy’s Law (HL) criteria are met. HL criteria are met if there is no alternative explanation for the elevations in liver biochemistry other than Drug Induced Liver Injury (DILI) caused by the Investigational Medicinal Product (IMP).

The Investigator is responsible for recording data pertaining to PHL/HL cases and for reporting Adverse Events (AE) and Serious Adverse Events (SAE) according to the outcome of the review and assessment in line with standard safety reporting processes.

Definitions

Potential Hy’s Law (PHL)

Aspartate Aminotransferase (AST) or Alanine Aminotransferase (ALT) ≥ 3x Upper Limit of Normal (ULN) **together with** Total Bilirubin (TBL) ≥ 2xULN at any point during the study following the start of study medication irrespective of an increase in Alkaline Phosphatase (ALP).

Hy’s Law (HL)

AST or ALT ≥ 3x ULN **together with** TBL ≥ 2xULN, where no other reason, other than the IMP, can be found to explain the combination of increases, e.g., elevated ALP indicating cholestasis, viral hepatitis, another drug.

For PHL and HL the elevation in transaminases must precede or be coincident with (i.e. on the same day) the elevation in TBL, but there is no specified timeframe within which the elevations in transaminases and TBL must occur.

Identification of Potential Hy’s Law Cases

In order to identify cases of PHL it is important to perform a comprehensive review of laboratory data for any patient who meets any of the following identification criteria in isolation or in combination:

- ALT ≥ 3xULN
- AST ≥ 3xULN
- TBL ≥ 2xULN

When a patient meets any of the identification criteria, in isolation or in combination, the central laboratory will immediately send an alert to the Investigator (also sent to Sponsor representative).

The Investigator will also remain vigilant for any local laboratory reports where the identification criteria are met, where this is the case the Investigator will:

- Notify the Sponsor representative
- Request a repeat of the test (new blood draw) by the central laboratory
- Complete the appropriate unscheduled laboratory CRF module(s) with the original local laboratory test result

When the identification criteria are met from central or local laboratory results the Investigator will without delay:

- Determine whether the patient meets PHL criteria (see Definitions within this Appendix for definition) by reviewing laboratory reports from all previous visits (including both central and local laboratory results)

The Investigator will without delay review each new laboratory report and if the identification criteria are met will:

- Notify the Sponsor representative
- Determine whether the patient meets PHL criteria (see Definitions within this Appendix for definition) by reviewing laboratory reports from all previous visits
- Promptly enter the laboratory data into the laboratory CRF

Follow-up

Potential Hy’s Law Criteria not met

If the patient does not meet PHL criteria the Investigator will:

- Inform the Sponsor representative that the patient has not met PHL criteria.
- Perform follow-up on subsequent laboratory results according to the guidance provided in the Clinical Study Protocol.

Potential Hy’s Law Criteria met

If the patient does meet PHL criteria the Investigator will:

- Determine whether PHL criteria were met at any study visit prior to starting study treatment (See Actions Required When Potential Hy’s Law Criteria are Met Before and After Starting Study Treatment)
- Notify the Company

The Company contacts the Investigator, to provide guidance, discuss and agree an approach for the study patients’ follow-up and the continuous review of data. Subsequent to this contact the Investigator will:

- Monitor the patient until liver biochemistry parameters and appropriate clinical symptoms and signs return to normal or baseline levels, or as long as medically indicated
- Investigate the etiology of the event and perform diagnostic investigations as discussed with the Company. << For studies using a central laboratory add: This includes deciding which the tests available in the Hy’s law lab kit should be used>>
- Complete the three Liver CRF Modules as information becomes available
- If at any time (in consultation with the Sponsor) the PHL case meets serious criteria, report it as an SAE using standard reporting procedures

Review and Assessment of Potential Hy’s Law Cases

The instructions in this Section should be followed for all cases where PHL criteria are met.

No later than 3 weeks after the biochemistry abnormality was initially detected, the Company contacts the Investigator in order to review available data and agree on whether there is an alternative explanation for meeting PHL criteria other than DILI caused by the IMP. The Sponsor Physician will also be involved in this review together with other subject matter experts as appropriate.

According to the outcome of the review and assessment, the Investigator will follow the instructions below.

If there is an agreed alternative explanation for the ALT or AST and TBL elevations, a determination of whether the alternative explanation is an AE will be made and subsequently whether the AE meets the criteria for a SAE:

- If the alternative explanation is **not** an AE, record the alternative explanation on the appropriate CRF
- If the alternative explanation is an AE/SAE, record the AE /SAE in the CRF accordingly

If it is agreed that there is **no** explanation that would explain the ALT or AST and TBL elevations other than the IMP:

- Report an SAE (report term ‘Hy’s Law’) according to standard processes.
- The ‘Medically Important’ serious criterion should be used if no other serious criteria apply
- As there is no alternative explanation for the HL case, a causality assessment of ‘related’ should be assigned.

If, there is an unavoidable delay, of over 3 weeks, in obtaining the information necessary to assess whether or not the case meets the criteria for HL, then it is assumed that there is no alternative explanation until such time as an informed decision can be made:

- Report an SAE (report term ‘Potential Hy’s Law’) applying serious criteria and causality assessment as per above
- Continue follow-up and review according to agreed plan. Once the necessary supplementary information is obtained, repeat the review and assessment to determine whether HL criteria are met. Update the SAE report according to the outcome of the review

Actions Required When Potential Hy’s Law Criteria are Met Before and After Starting Study Treatment

This section is applicable to patients << with liver metastases>> who meet PHL criteria on study treatment having previously met PHL criteria at a study visit prior to starting study treatment.

At the first on study treatment occurrence of PHL criteria being met the Investigator will:

- Determine if there has been a significant change in the patients’ condition# compared with the last visit where PHL criteria were met#
- If there is no significant change no action is required
- If there is a significant change notify the Sponsor representative, who will inform the Company, then follow the subsequent process described in Potential Hy’s Law Criteria met of this Appendix

#A ‘significant’ change in the patient’s condition refers to a clinically relevant change in any of the individual liver biochemistry parameters (ALT, AST or total bilirubin) in isolation or in combination, or a clinically relevant change in associated symptoms. The determination of whether there has been a significant change will be at the discretion of the Investigator, this may be in consultation with the Company if there is any uncertainty.

Actions Required for Repeat Episodes of Potential Hy’s Law

This section is applicable when a patient meets PHL criteria on study treatment and has already met PHL criteria at a previous on study treatment visit.

The requirement to conduct follow-up, review and assessment of a repeat occurrence(s) of PHL is based on the nature of the alternative cause identified for the previous occurrence.

The Investigator should determine the cause for the previous occurrence of PHL criteria being met and answer the following question:

- Was the alternative cause for the previous occurrence of PHL criteria being met found to be the disease under study e.g. chronic or progressing malignant disease, severe infection or liver disease, << or did the patient meet PHL criteria prior to starting study treatment and at their first on study treatment visit as described in Actions Required When Potential Hy’s Law Criteria are Met Before and After Starting Study Treatment >>?

If No: follow the process described in Potential Hy’s Law Criteria met of this Appendix

If Yes:

Determine if there has been a significant change in the patient’s condition# compared with when PHL criteria were previously met

- If there is no significant change no action is required
- If there is a significant change follow the process described in Section 4.2 of this Appendix

A ‘significant’ change in the patient’s condition refers to a clinically relevant change in any of the individual liver biochemistry parameters (ALT, AST or total bilirubin) in isolation or in combination, or a clinically relevant change in associated symptoms. The determination of whether there has been a significant change will be at the discretion of the Investigator; this may be in consultation with the Company if there is any uncertainty.

References

FDA Guidance for Industry (issued July 2009) ‘Drug-induced liver injury: Premarketing clinical evaluation’: <http://www.fda.gov/downloads/Drugs/GuidanceComplianceRegulatoryInformation/Guidances/UCM174090.pdf>

Appendix F. Further Guidance on the Definition of a Serious Adverse Event (SAE)

Life threatening

‘Life-threatening’ means that the subject was at immediate risk of death from the AE as it occurred or it is suspected that use or continued use of the product would result in the subject’s death. ‘Life-threatening’ does not mean that had an AE occurred in a more severe form it might have caused death (e.g. hepatitis that resolved without hepatic failure).

Outpatient treatment in an emergency room is not in itself a serious AE, although the reasons for it may be (e.g. bronchospasm, laryngeal oedema). Hospital admissions and/or surgical operations planned before or during a study are not considered AEs if the illness or disease existed before the subject was enrolled in the study, provided that it did not deteriorate in an unexpected way during the study.

Important medical event or medical intervention

Medical and scientific judgement should be exercised in deciding whether a case is serious in situations where important medical events may not be immediately life threatening or result in death, hospitalisation, disability or incapacity but may jeopardize the subject or may require medical intervention to prevent one or more outcomes listed in the definition of serious. These should usually be considered as serious.

Simply stopping the suspect drug does not mean that it is an important medical event; medical judgement must be used.

- Angioedema not severe enough to require intubation but requiring iv hydrocortisone treatment
- Hepatotoxicity caused by paracetamol (acetaminophen) overdose requiring treatment with N-acetylcysteine
- Intensive treatment in an emergency room or at home for allergic bronchospasm
- Blood dyscrasias (e.g. neutropenia or anaemia requiring blood transfusion, etc.) or convulsions that do not result in hospitalisation

Development of drug dependency or drug abuse

A Guide to Interpreting the Causality Question

When making an assessment of causality consider the following factors when deciding if there is a ‘reasonable possibility that an AE may have been caused by the drug.

- Time Course. Exposure to suspect drug. Has the subject actually received the suspect drug? Did the AE occur in a reasonable temporal relationship to the administration of the suspect drug?
- Consistency with known drug profile. Was the AE consistent with the previous knowledge of the suspect drug (pharmacology and toxicology) or drugs of the same pharmacological class? Or could the AE be anticipated from its pharmacological properties?
- De-challenge experience. Did the AE resolve or improve on stopping or reducing the dose of the suspect drug?
- No alternative cause. The AE cannot be reasonably explained by another aetiology such as the underlying disease, other drugs, other host or environmental factors.
- Re-challenge experience. Did the AE reoccur if the suspected drug was reintroduced after having been stopped? Sponsor would not normally recommend or support a re-challenge.
- Laboratory tests. A specific laboratory investigation (if performed) has confirmed the relationship.

In difficult cases, other factors could be considered such as:

- Is this a recognized feature of overdose of the drug?
- Is there a known mechanism?

Causality of ‘related’ is made if following a review of the relevant data, there is evidence for a ‘reasonable possibility’ of a causal relationship for the individual case. The expression ‘reasonable possibility’ of a causal relationship is meant to convey, in general, that there are facts (evidence) or arguments to suggest a causal relationship.

The causality assessment is performed based on the available data including enough information to make an informed judgment. With limited or insufficient information in the case, it is likely that the event(s) will be assessed as ‘not related’.

Causal relationship in cases where the disease under study has deteriorated due to lack of effect should be classified as no reasonable possibility.

# Appendix g. Inhibitors and Inducers of CYP1A2, CYP2C19 OR CYP3A4

Changes to, or addition of, the following medications should be avoided, unless clinically indicated:

| Table 3 Inhibitors of CYP1A2, CYP2C19 or CYP3A4 | | |
| --- | --- | --- |
| CYP1A2 | CYP2C19 | CYP3A4 |
| Fluvoxamine |  | Indinavir |
| Ciprofloxacin |  | Nelfinavir |
|  |  | Ritonavir |
|  |  | Clarithromycin |
|  |  | Itraconazole |
|  |  | Ketoconazole |
|  |  | Nefazodone |
|  |  | Saquinavir |
|  |  | Suboxone |
|  |  | Telithromycin |
|  |  | Aprepitant |
|  |  | Erythromycin |
|  |  | Fluconazole |
|  |  | Grapefruit juice |
|  |  | Verapamil |
|  |  | Diltiazem |

| Table 4 Inducers of CYP1A2, CYP2C19 or CYP3A4 | | |
| --- | --- | --- |
| CYP1A2 | CYP2C19 | CYP3A4 |
| Methylcholanthrene | Carbamazepine | Efavirenz |
| Modafinil | Norethindrone | Nevirapine |
| Nafcillin | Prednisone | Barbiturates |
| Beta‑naphthoflavone | Rifampin | Carbamazepine |
| Omeprazole |  | Glucocorticoids |
|  |  | Modafinil |
|  |  | Oxcarbazepine |
|  |  | Phenobarbital |
|  |  | Phenytoin |
|  |  | Pioglitazone |
|  |  | Rifabutin |
|  |  | Rifampin |
|  |  | St John's wort |
|  |  | Troglitazone |

**<FINAL PROTOCOL>**

|  | Drug Substance | Selumetinib (AZD6244; ARRY-142886) |
| --- | --- | --- |
|  | Study Number | ESR-17-12847 |
|  | Company Reference | ESR-17-12847 |
|  | Version | 4.0 |
|  | Date | 20 JUN 2020 |
|  |  |  |
|  | | |
| Safety and efficacy of Selumetinib in Korean patients with neurofibromatosis type 1 and plexiform neurofibromas | | |
|  | | |
| title page | | |
|  | | |
| This submission /document contains trade secrets and confidential commercial information, disclosure of which is prohibited without providing advance notice to AstraZeneca and opportunity to object. | | |

Version History

| **Version 1.2, 21 JUNE 2017** |
| --- |
| Revised on 13 SEP 2017 |
| Revised on 31 MAY 2018 |
| Version 2.0, Revised on 18 FEB 2019 |
| Version 3.0, Revised on 01 DEC 2019 |
| Version 3.1, Revised on 17 APR 2020 |
| Version 4.0, Revised on 20 JUN 2020 |
